# Supplementary material
Source: PubMed Central journal article supplement (PMC2930400)
Supplement: es100159c_si_001.pdf [file es100159c_si_001.pdf]

## Supporting Information for:

### **Semivolatile endocrine disrupting compounds in paired indoor and outdoor air in two northern California communities**

*Ruthann A. Rudel,<sup>1\*</sup> Robin E. Dodson,<sup>1</sup> Laura J. Perovich,<sup>1</sup> Rachel Morello-Frosch,<sup>2</sup> David E. Camann,<sup>3</sup> Michelle M. Zuniga,<sup>3</sup> Alice Y. Yau,<sup>3</sup> Allan C. Just,<sup>4</sup> Julia Green Brody<sup>1</sup>*

<sup>1</sup> Silent Spring Institute, 29 Crafts Street, Newton, MA 02458

<sup>2</sup> Department of Environmental Science, Policy and Management and School of Public Health, 137 Mulford Hall, University of California, Berkeley, CA 94720

<sup>3</sup> Southwest Research Institute, 6220 Culebra Road, San Antonio, TX 78228

<sup>4</sup> Department of Environmental Health Sciences, Mailman School of Public Health, Columbia University, 60 Haven Ave B-109, New York, NY 10032

#### CONTENTS:

Details of Chemical Analytical Methods

Quality Assurance/Quality Control Methods and Results

Additional Results and Discussion: PAHs and Pesticides

Factor Analysis of Chemical Mixtures in Outdoor and Indoor Air

References

Table S1 – Summary statistics for endocrine disruptors in outdoor and indoor air in all California homes

Table S2 – Summary statistics for endocrine disruptors detected in outdoor air in Richmond and Bolinas (ng/m<sup>3</sup>)

Table S3 – Summary statistics for endocrine disruptors detected in indoor air in Richmond and Bolinas (ng/m<sup>3</sup>)

Table S4 – Quality Assurance/Quality Control summary data

Figure S1 - Distribution of indoor-outdoor concentration differences for selected chemicals

Figure S2 – Kendall's tau correlations between chemicals

Figures S3a-c – Factor loadings from the exploratory factor analysis of outdoor and indoor air

Figure S4 – Distribution of surrogate recoveries

## Details of Sampling and Chemical Analytical Methods

### Custom Sampling Pump

Custom-made air sampling pumps built at the Harvard School of Public Health consisted of an Advanced Torque Systems 70 LPM linear vacuum pump with 3 parallel sampling ports and a bleed (each controlled with Swagelok air regulating valves), a weather resistant enclosure and used standard AC power. Teflon tubing was used to reduce opportunities for contamination by phthalates or other target analytes. URG sampling cartridges were attached to the pump by Teflon hoses and were located “upstream” of the pump. Cartridges were suspended from a wooden rack about 4-5 feet above the floor/ground using metal clips. Indoor samples were typically collected in the living room and cartridges were at least 3 feet from the wall. Outdoor samples were typically collected in backyards, at least 5 feet from a wall. Cartridges were shielded from possible rain by an “umbrella” made of an inverted stainless steel bowl attached about 1 foot above the cartridges, however it rarely rained during the collection period (June-October in northern California).

### Neutrals/Phthalates Extraction and Analysis

The contents of each URG (XAD-2/PUF/filter) were placed in a Soxhlet and 100  $\mu$ L of surrogate solution (diazinon-d10, anthracene-d10 and p-terphenyl-d10 at 2 ng/ $\mu$ L) was added and matrix spike solution as required. The samples were extracted for 16 h in 150 - 200 mL of 6% ether in hexanes solution. After being cooled, if water was visibly present in any of the extracts, the extract was passed through a glass drying tube containing sodium sulfate. The extracts were concentrated to a final volume of 1 mL and quantitatively transferred to a 1-dram vial and the final volume was adjusted using 10% diethyl ether in hexanes.

Analysis for the 80 neutral target analytes was performed using an Agilent 6890 GC coupled with an Agilent 5973 Mass Selective detector run in selected ion monitoring (SIM) mode. Due to the large number of target analytes, two analyses were performed. A total of 45 analytes (pesticides, PCBs, PBDEs and benzyl butyl phthalate) were determined in the first analysis on a ZB-5ms 60 m x 0.25 mm i.d. x 0.25  $\mu$ m column. Quantification was performed using o-phenylphenol-13C6, acenaphthene-d10, carbaryl-13C6, chlorpyrifos-d10, chrysene-d12 and cis-permethrin-13C6 as the internal standards. A total of 35 analytes (PAHs, sulfur PAHs, methyl phenanthrenes and the remaining phthalates) were determined in the second analysis on a ZB-5ms 30 m x 0.25 mm i.d. x 0.25  $\mu$ m column. Quantification was performed using acenaphthene-d10, phenanthrene-d10 and chrysene-d12 as the internal standards. The surrogate diazinon-d10 was determined in the first analysis and anthracene-d10 and p-terphenyl-d10 were determined in the second analysis. A continuing calibration standard was processed at the beginning and end of each sequence of 15 samples. The percent relative standard deviation (%RSD) was maintained within 30% during the initial five-point standard calibration. The percent difference of each analyte in the mid-level standard was generally maintained within 40% of the initial calibration value during continuing calibrations.

### Phenols Extraction and Analysis

The contents of each URG (quartz filter/PUF/XAD-2) was spiked with surrogate solution, consisting of 2,4,6-tribromophenol, 4-nonylphenol-d4 and bisphenol A-d4 at 2 ng/ $\mu$ L and matrix spike solution as required. The samples were extracted 3 times with 50 mL of acidified GC2 grade dichloromethane (DCM). The samples were shaken 10 min per extraction. After each

extraction, the DCM was decanted thru a glass drying tube (1.5 in. diameter, 5 in. length, HGF Scientific, Inc. Stafford, TX) containing a glass wool plug. After the last extraction, the PUF was added to the drying tube to remove any residual water. The extracts were concentrated to 1.0 mL under zero nitrogen using an N-EVAP analytical evaporator at 35 – 40°C. All glassware was washed with acidified DCM (3 mL of HCl/600 mL of DCM) prior to use.

The air extracts were derivatized with *N,O*-bis(trimethylsilyl) trifluoroacetamide (BSTFA) + 10% Trimethylchlorosilane (TMCS) at 60°C for 60 min. Analysis was performed on an Agilent 6890 coupled with an Agilent 5973 Mass Selective detector run in selected ion monitoring (SIM) mode. A 30 m x 0.32 mm i.d. HP-5 column was used as the GC analytical column. Quantification was performed using 3,4,5-trichlorophenol, *o*-phenylphenol-13C6 and pentachlorophenol-13C6 as internal standards. The percent relative standard deviation (%RSD) of each analyte was maintained within 30% during the initial five-point calibration. A continuing calibration standard was processed at the beginning and end of each sequence of 15 samples. The percent difference of each analyte in the mid-level standard was generally maintained within 40% of the initial calibration value during continuing calibrations.

### **Quality Assurance/Quality Control (QA/QC) Methods and Results**

Extensive QA/QC measures were conducted to ensure accuracy and reliability of measurements. To evaluate contamination from laboratory, sampling matrices, and sample handling, we analyzed field blanks (n=4 neutrals; 3 phenols), sampling cartridge batch blanks (n=5), and matrix blanks (n=6 neutrals, 5 phenols). To estimate precision we collected four duplicate air samples for the neutral analytical method and one duplicate sample for the phenols method. Matrix spikes (n=2) and surrogate recoveries were used to characterize accuracy, compound recovery from the matrix, and extraction efficiency.

For each analyte, the method reporting limit (MRL) was defined as the maximum of the analytical detection limit or the 90<sup>th</sup> percentile of the blank concentrations, considering batch, matrix, and field blanks. MRLs were calculated on a mass-basis and converted to a concentration by dividing by the average sample volume. Estimated concentrations falling above the analytical detection level and below the MRL were flagged and were not counted as detects when calculating %>MRL, but were used in correlation analyses, statistical testing, and in graphical presentation of the concentration distributions.

Potential air sample contamination by target compounds was evaluated using batch, matrix, and field blanks. Laboratory analysts were blinded to the identity of the field blanks. The target compounds benzyl butyl phthalate, bis(2-ethylhexyl) adipate, bis(2-ethylhexyl) phthalate, di-*n*-butyl phthalate, di-*n*-hexyl phthalate, di-*n*-octyl phthalate, dicyclohexyl phthalate, diethyl phthalate, diisobutyl phthalate, 4-nonylphenol, PBDE 47, dibenz(a,h)anthracene, fluorene, indeno(1,2,3-cd)pyrene, phenanthrene, 4,4'-DDE, 4,4'-DDT, pentachlorophenol, *o*-phenyl phenol, 2,4-dihydroxybenzophenone, and 4-nitrophenol were detected in at least one blank. Mass values for one batch blank were especially elevated for six compounds: bis(2-ethylhexyl) phthalate, bis(2-ethylhexyl) adipate, di-*n*-octyl phthalate, PBDE 47, and 4,4'-DDE, 4,4'-DDT. Mass values for another batch blank were especially elevated for di-*n*-hexyl phthalate, dicyclohexylphthalate, dibenzo(a,h)anthracene, fluorene, and pyrene. These elevated mass values were not consistent across all blank samples, most of which were much lower. Maximum concentrations detected in the blanks are given in Table S4. In Figures 1a-h, concentrations less than the 90 percentile of the blanks (the MRL) are displayed as estimated values and so can be

readily differentiated from values that are not qualified. Because there are more than 10 blanks, this method of calculating the MRL (using the 90<sup>th</sup> percentile of blanks) is not sensitive to the case where most blanks are low but there is one high value. Because of this, Table S-4 includes both the MRL based on the 90<sup>th</sup> percentile and a MRL calculated based on the highest blank to aid in identifying these cases. We have also identified in Tables S1 and S4 those compounds that had at least one detected blank above the median field sample concentration, indicating less certainty in the reported values. We chose the 90<sup>th</sup> percentile of blanks as the MRL for this study because it is less sensitive to extreme values and can be estimated for data that are not normally distributed. However, reported measurements near the MRL based on the maximum blank values are less certain than those far above any blank values. Any compounds with detects in blanks and no reported values above the MRL were dropped from the analyte list, since background noise interfered with measurements for these compounds. In addition, octylphenol mono-ethoxylate and octylphenol di-ethoxylate were dropped from further consideration because of concerns that laboratory contamination of the sampling matrix may have interfered with measurements. In reviewing the data for these compounds, we observed that 1) the overall distribution of blank and field samples were completely overlapping (even though a few field samples had detects at higher concentrations than the highest blank) and 2) the highest detects were observed in outdoor field samples, despite the expectation that these would be primarily indoor contaminants. Although we cannot be sure that these findings were due to blank contamination, we do not have enough confidence in these data to report them in this paper.

Blank correction, used to correct potential bias in the reported levels, was performed if the median mass of the blank samples was significantly different from zero as determined by a Wilcoxon rank sum test. Five analytes (benzyl butyl phthalate, bis(2-ethylhexyl) phthalate, di-n-butyl phthalate, diethyl phthalate, and diisobutyl phthalate) were subjected to blank correction by subtracting the median blank value from the reported value and these data are presented in Table S4.

Four neutral and one phenol duplicate samples were used to assess precision. For values below the MRL, the sample-specific method reporting limit (volume adjusted) was used in the percent difference calculations. Percent differences for duplicates where both values were above the MRL were typically less than 30%. For a few compounds, average percent differences were higher than 30% (anthracene, 86%; 4,6-dimethyl dibenzothiophene, 31%; 2-methyl dibenzothiophene, 31%; and 4,4'-DDT, 32%; ). See Table S4.

Accuracy was evaluated using matrix spike samples. Average recoveries for two matrix spike samples ranged from 38-208% across compounds, with an average recovery of 85%. Four air analytes (1-nitropyrene, 2,2-bis(bromomethyl)-1,3-propanediol, 3,5,6-trichloro-2-pyridinol, and 4,4'-biphenyldiol) had average matrix recoveries outside of the 50-150% acceptance range and were subsequently dropped from further analysis. See Table S4.

Surrogate recoveries were generally within the 50-150% acceptance range. Three different surrogates were used to evaluate each analytical method. Diazinon-d10, anthracene-d10, and p-terphenyl-d14 were used as surrogates in the neutral analytical method (n=114) and 2,4,6-tribromophenol, 4-nonylphenol-d4, and bisphenol A-d4 were used in the phenols analytical method (n=75). Recovery of diazinon-d10 was acceptable in all samples (114/114), recovery of anthracene-d10 was above 150% for 2/114 samples, recovery of p-terphenyl-d14 was above 150% in 1/114 samples, recovery of 2,4,6-tribromophenol was acceptable in all samples (75/75), recovery of 4-nonylphenol-d4 was below 50% in 3/75 samples, and recovery of bisphenol A-d4

was below 50% in 8/75 samples. Despite sporadic recoveries outside of the pre-determined acceptable range, reported values were not adjusted or corrected. See Table S4.

## **Additional Results and Discussion**

### Polycyclic Aromatic Hydrocarbons

PAHs arise from a variety of combustion-related sources. A total of 24 PAHs were analyzed, ranging from lower molecular weight, 2-ring PAHs (e.g. acenaphthylene), to the higher molecular weight, 6 ring PAH, dibenzo(a,e)pyrene. In addition, 4 thiophenes -- PAH compounds characterized by a 5-membered ring containing sulfur -- were measured due to their potential associations with petroleum refining, since crude oil with high sulfur content is refined at the Chevron refinery adjacent to the Richmond study community.

**Outdoor Air.** Of the 12 PAHs detected outdoors, 7 were detected at significantly higher frequencies in Richmond versus Bolinas ( $p < 0.05$ ) and none were detected significantly more often in Bolinas (Table S2). All three of the PAHs with adequate detects ( $> 50\%$  above MRL in both communities) were detected at significantly higher median concentrations in Richmond than Bolinas. The 4 methylphenanthrenes (3-ring PAHs) were detected in almost all Richmond outdoor air samples but very few Bolinas samples. Acenaphthene (2 ring), fluorene (3 ring), and phenanthrene (3 ring), all lower molecular weight PAHs (MW: 154-178), were detected in almost all outdoor air samples; and they were observed at significantly higher median concentrations in Richmond ( $p < 0.05$ ). Fluoranthene and pyrene (4 ring PAHs) and acenaphthylene (2-ring) were more frequently detected in Richmond. The heavier, 5-6 ring PAHs were not detected outdoors in either community. Dibenzothiophene, the only thiophene (sulfur-containing PAH) detected outdoors, was detected in three Richmond outdoor samples.

Outdoor concentrations of phenanthrene and pyrene were lower than those reported in the RIOPA study, which targeted worst-case locations for outdoor pollution (1).

**Indoor Air.** Nine PAHs, all 2-4 ring PAHs, including the 4 methylphenanthrenes, acenaphthene, fluoranthene, fluorene, phenanthrene and pyrene, were detected in 100% of indoor air samples (Table S1). Five PAHs (acenaphthene, fluoranthene, fluorene, phenanthrene, and pyrene) had significantly higher median indoor concentrations in Richmond, while indoor levels of the methyl phenanthrenes did not differ between communities (Table S3). Maximum indoor anthracene concentrations were similar between Cape Cod and California (3.7 vs. 5 ng/m<sup>3</sup> respectively); however, indoor pyrene concentrations were much higher in two homes in Richmond than the reported maximum in Cape Cod (27 vs 3.4 ng/m<sup>3</sup>). Observed indoor air phenanthrene concentrations (6.1 to 44 ng/m<sup>3</sup>) are in the lower range of previously reported concentrations (2).

**Indoor-Outdoor Relationships.** Indoor air concentrations of PAHs tend to exceed outdoor air concentrations; however, in some instances, the ranges of concentrations are similar (e.g. fluoranthene and pyrene) (Figure 1). Median indoor concentrations of 8 PAHs were significantly higher than corresponding outdoor concentrations, ( $p < 0.05$ ), and median indoor-outdoor differences were significantly greater than zero for 10 of 12 PAHs with at least 50% pairs  $>$  MRL (anthracene and fluoranthene were not significant). Figure S1 shows paired indoor-outdoor differences for phenanthrene, as an example compound with indoor-outdoor differences below zero, illustrating the influence of outdoor sources.

Scatterplots of PAHs in indoor and outdoor air suggest a combination of indoor and outdoor sources (Figure 2). The methyl phenanthrenes, seem to be dominated by indoor sources based on higher indoor relative to outdoor concentrations and lack of indoor-outdoor correlation. Acenaphthene, fluorene, fluoranthene, and phenanthrene, however, appear to have important outdoor sources with data points closer to the 1:1 line and significant positive correlation between indoors and outdoors ( $p < 0.05$ ). Pyrene also appears to originate from both indoor and outdoor sources although the correlation was not significant. Thus, PAHs are elevated in Richmond ambient and indoor air compared with Bolinas, and correlations between indoor and outdoor levels indicate the influence of outdoor sources on indoor concentrations for some PAHs. The methyl phenanthrenes, however, appear to be originating primarily from indoor sources.

### Pesticides

A total of 38 pesticides were targeted in this study including banned organochlorines (e.g. DDT, PCP), and current use products such as carbamates (e.g. propoxur), organophosphates (e.g. chlorpyrifos), and pyrethroids (cypermethrin). o-Phenylphenol, a phenolic compound registered as a microbicide and with other uses, including as a plasticizer, was also measured.

**Outdoor Air.** Thirteen pesticides were detected outdoors (Table S2). o-Phenylphenol was detected most frequently and at higher concentrations in Richmond. The insecticides chlorpyrifos, permethrin, diazinon, and malathion, the fungicide chlorothalonil, and DDE (a breakdown product of DDT) were detected in 1-2 Richmond samples and not in Bolinas. The wood preservative pentachlorophenol was detected in 55% of Richmond samples and not in Bolinas, The older insecticides chlordane and heptachlor and the herbicide trifluralin were detected in one Bolinas sample but not in Richmond. The concentration of chlordane (sum of *alpha*- and *gamma*-chlordane) in this sample was higher than many others reported in the literature (3).

**Indoor Air.** Sixteen pesticides were detected in indoor air (Table S3). Pesticides were detected more frequently indoors than outdoors, and more pesticides were detected indoors in Richmond than Bolinas, although detection frequencies were similar in the 2 communities. alpha-Chlordane was found at higher concentrations in Bolinas (<MRL to 3.5 ng/m<sup>3</sup>). Chlorpyrifos had some substantially higher concentrations in Richmond (range in Richmond <MRL to 9.9 ng/m<sup>3</sup>; range in Bolinas <MRL to 1 ng/m<sup>3</sup>). The contemporary insecticides propoxur, diazinon, permethrin and piperonyl butoxide (synergist), were detected in a few Richmond samples.

Comparison of detection frequencies between this study and Cape Cod is not feasible, because this study has substantially lower MRLs. However, the maximum indoor air concentrations of many of the historic use pesticides in this study were 4-35 times lower than those reported from Cape Cod; whereas the maximum concentrations of the more contemporary pyrethroid pesticides, *cis*- and *trans*-permethrin, were similar. o-Phenylphenol, which was detected in 100% of indoor air samples in both studies, was found at much higher concentrations in Cape Cod (range 12 to 970 ng/m<sup>3</sup>, median 70 ng/m<sup>3</sup>) compared to the present study (range 2.8 to 61 ng/m<sup>3</sup>, median 8.5 ng/m<sup>3</sup>). Differences between the Cape Cod and California studies may be due to geographic differences in use patterns, for example DDT may have been used more extensively on Cape Cod than in northern California, or the older study population on Cape Cod may simply have had older homes and furnishings that predated the DDT ban. For o-phenyl phenol, since it has a wider variety of uses beyond as an antimicrobial, and since it was identified

as an EDC during the 1990s, the lower levels in California may reflect changes in product formulations or use patterns between 2000, when Cape Cod homes were sampled, and 2006, when California homes were sampled.

**Indoor-Outdoor Relationships.** Chlordane, DDT, DDE, chlorpyrifos, propoxur, and the synergist piperonyl butoxide were detected with significantly greater frequency in indoor air compared to outdoor samples (Table S1) ( $p < 0.05$ ), and for three of these, paired indoor-outdoor concentration differences indicate mostly indoor sources and/or limited degradation indoors (Figure S1). Only the microbicide o-phenylphenol was detected frequently, and indoor concentrations were significantly higher ( $p < 0.05$ ) (Figure 1) and not correlated (Figure 2), indicating dominant indoor sources. In general, the historic-use organochlorines were detected more frequently indoors than outdoors. Malathion and trifluralin, both of which are approved for outdoor and not indoor use, were detected in one outdoor sample each but not indoors.

### **Mixtures: Factor Analysis**

Exploratory factor analyses were conducted on log-transformed indoor and outdoor air concentrations in order to identify potential structures within the data. These analyses are exploratory and must be interpreted with caution given the small sample size. Only those compounds with reported concentration values for 100% of the samples were included, resulting in inclusion of a limited number of analytes, mostly phthalates and PAHs. Phthalates BBP, DBP, DEHA, DEHP, DEP and DIBP and PAHs acenaphthene and phenanthrene were included in exploratory factor analysis of outdoor air. For indoor air, nonylphenol, 4-t-butylphenol, the phthalates BBP, DBP, DEHA, DEHP, DEP, and DIBP, the PAHs 1-methylphenanthrene, 2-methylphenanthrene, 3-methylphenanthrene, 9-methylphenanthrene, fluorene, fluoranthene, phenanthrene, and pyrene, and o-phenylphenol were included. Factor designations were confirmed using proc factor (method = ML and rotation = promax) in SAS (Version 9). Results are shown in Figure S2.

*Outdoor air.* Factor analysis revealed two factors for the outdoor air data ( $n=43$ ). The first factor with loadings  $\geq 0.4$  included the PAHs acenaphthene (loading = 0.96) and phenanthrene (0.95), with moderately weak loadings for DEHA (0.46) and DIBP (0.41). The second factor included DBP (0.99), BBP (0.74), and DIBP (0.47). Note the DIBP loaded onto both factors but with stronger loading on Factor 2. Both DEHP and DEP failed to load on either factor. Inclusion of DEHA in the first factor with two PAH compounds is expected based on the significant positive Kendall tau correlation estimates between DEHA and most PAHs. BBP and DBP, both with strong loadings in Factor 2, were also fairly strongly correlated in the Kendall tau correlation analysis (Figure S2), suggesting shared sources.

*Indoor air.* Factor analysis was conducted in two different ways: 1) including data from only those homes with both phenol and neutral sample analysis ( $n=31$ ) and 2) including data from only neutral sample analysis ( $n=50$ ). In the combined data, three factors were revealed. Factor 1 included methylphenanthrenes (0.89-0.94), BBP (0.68), DBP (0.75), DEP (0.62), and o-phenylphenol (0.91). Factor 2 included PAHs acenaphthene (0.81), fluorene (0.81), fluoranthene (0.98), phenanthrene (0.85), and pyrene (0.82). Factor 3 included 4-t-butylphenol (0.59), nonylphenol (0.45), DEHA (0.62), DEHP (1.0), and DIBP (0.60). For the neutral only data, three factors were also revealed. Factor 1 was similar to Factor 1 from the combined neutrals-phenols data analysis and included methylphenanthrenes (0.92-1.0), BBP (0.48), DBP (0.78), DEP (0.44), and o-phenylphenol (0.81). It also included two phthalates (DEHP and DIBP) that

were previously found in Factor 3 of the combined data analysis. Factor 2 included PAHs fluoranthene (1.0), phenanthrene (0.59), and pyrene (0.97), as it did in the combined analysis. Factor 3, however, included two PAHs loaded onto Factor 2 in the combined analysis, namely acenaphthene (0.94) and fluorene (0.70). DEHP failed to load (<0.4) in the neutral only analysis. Factor 1 in both analyses included compounds associated with indoor sources, including the methylphenanthrenes. Factor 2 in both analyses included PAHs, which have important outdoor sources. Factor 3 seemed to include a subset of PAHs. In the combined analysis, it included the phenolic compounds and some phthalates, which are typically indoor source compounds, although they were detected outdoors (in Richmond). In the neutral only analysis, it included acenaphthene and fluorene, which may have both indoor and outdoor sources and were fairly strongly correlated with each other ( $\tau = 0.7$ ).

## References

- (1) Naumova, Y. Y.; Eisenreich, S. J.; Turpin, B. J.; Weisel, C. P.; Morandi, M. T.; Colome, S. D.; Totten, L. A.; Stock, T. H.; Winer, A. M.; Alimokhtari, S.; Kwon, J.; Shendell, D.; Jones, J.; Maberti, S.; Wall, S. J. Polycyclic aromatic hydrocarbons in the indoor and outdoor air of three cities in the US. *Environmental Science & Technology* **2002**, *36*, 2552-2559.
- (2) Barro, R.; Regueiro, J.; Llompart, M.; Garcia-Jares, C. Analysis of industrial contaminants in indoor air: Part 1. Volatile organic compounds, carbonyl compounds, polycyclic aromatic hydrocarbons and polychlorinated biphenyls. *Journal of Chromatography A* **2009**, *1216*, 540-566.
- (3) Rudel, R. A.; Perovich, L. J. Endocrine disrupting chemicals in indoor and outdoor air. *Atmospheric Environment* **2009**, *43*, 170-181.



Table S1. Summary statistics for endocrine disruptors in outdoor and indoor air in all California homes (ng/m<sup>3</sup>)

| Compound                                       | Abbrev. | Outdoor          |                      |      |        |            |      | Indoor |         |      |        |            |      | F.E. Test <sup>c</sup> | Wil. Test <sup>d</sup> | MRL | Ref.       |
|------------------------------------------------|---------|------------------|----------------------|------|--------|------------|------|--------|---------|------|--------|------------|------|------------------------|------------------------|-----|------------|
|                                                |         | No. <sup>a</sup> | % > MRL <sup>b</sup> | Min. | Median | 95th %tile | Max. | No.    | % > MRL | Min. | Median | 95th %tile | Max. |                        |                        |     |            |
| <i>Phthalates</i>                              |         |                  |                      |      |        |            |      |        |         |      |        |            |      |                        |                        |     |            |
| benzyl butyl phthalate <sup>e,g</sup>          | BBP     | 43               | 5                    | --   | --     | 4.8        | 8.5  | 50     | 50      | --   | 6.8    | 38         | 80   | I                      | --                     | 6   | 1, 2(I)    |
| bis(2-ethylhexyl) adipate <sup>g</sup>         | DEHA    | 43               | 100                  | 1.0  | 2.1    | 5.5        | 8.7  | 50     | 100     | 6.9  | 27     | 70         | 76   |                        | I                      | 1   | 1, 2(IIIb) |
| bis(2-ethylhexyl) phthalate <sup>e,g</sup>     | DEHP    | 43               | 14                   | --   | --     | 120        | 230  | 50     | 82      | --   | 68     | 130        | 200  | I                      | --                     | 40  | 1, 2(I)    |
| di-n-butyl phthalate <sup>e</sup>              | DBP     | 43               | 35                   | --   | --     | 15         | 32   | 50     | 100     | 28   | 140    | 550        | 1100 | I                      | --                     | 7   | 1, 2(I)    |
| di-n-hexyl phthalate <sup>g</sup>              | DHP     | 43               | 5                    | --   | --     | 4.5        | 15   | 50     | 2       | --   | --     | --         | 52   |                        | --                     | 6   | 1, 2(II)   |
| di-n-octyl phthalate <sup>g</sup>              | DOP     | 43               | 0                    | --   | --     | --         | --   | 50     | 2       | --   | --     | --         | 0.80 |                        | --                     | 0.7 | 2(IIIb)    |
| di-n-pentyl phthalate                          | DPeP    | 43               | 0                    | --   | --     | --         | --   | 50     | 2       | --   | --     | --         | 4.0  |                        | --                     | 0.7 | 1, 2(I)    |
| di-n-propyl phthalate                          | DPP     | 43               | 0                    | --   | --     | --         | --   | 50     | 2       | --   | --     | --         | 2.3  |                        | --                     | 1   | 1, 2(II)   |
| dicyclohexyl phthalate <sup>f,g</sup>          | DCP     | 43               | 5                    | --   | --     | 0.77       | 2.0  | 50     | 0       | --   | --     | --         | --   |                        | --                     | 0.7 | 1, 2(I)    |
| diethyl phthalate <sup>e</sup>                 | DEP     | 43               | 47                   | --   | --     | 160        | 610  | 50     | 100     | 110  | 330    | 1200       | 2500 | I                      | --                     | 60  | 1, 2(I)    |
| diisobutyl phthalate <sup>e</sup>              | DIBP    | 43               | 93                   | --   | 3.6    | 11         | 18   | 50     | 100     | 17   | 130    | 370        | 1700 |                        | I                      | 1   | 1, 2(I)    |
| <i>Alkylphenols</i>                            |         |                  |                      |      |        |            |      |        |         |      |        |            |      |                        |                        |     |            |
| 4-nonylphenol <sup>f,g</sup>                   | NP      | 29               | 14                   | --   | --     | 34         | 40   | 31     | 97      | --   | 53     | 86         | 89   | I                      | --                     | 10  | 1, 2(I)    |
| nonylphenol monoethoxylate                     | NP1EO   | 29               | 0                    | --   | --     | --         | --   | 31     | 97      | --   | 20     | 41         | 72   | I                      | --                     | 6   | 1          |
| nonylphenol diethoxylate                       | NP2EO   | 29               | 0                    | --   | --     | --         | --   | 31     | 3       | --   | --     | --         | 18   |                        | --                     | 7   | 1, 2(II)   |
| <i>Parabens</i>                                |         |                  |                      |      |        |            |      |        |         |      |        |            |      |                        |                        |     |            |
| butyl paraben                                  | BuPa    | 29               | 0                    | --   | --     | --         | --   | 31     | 3       | --   | --     | --         | 7.8  |                        | --                     | 0.8 | 2(I)       |
| ethyl paraben                                  | EtPa    | 29               | 0                    | --   | --     | --         | --   | 31     | 0       | --   | --     | --         | --   |                        | --                     | 0.8 | 2(I)       |
| methyl paraben                                 | MePa    | 29               | 0                    | --   | --     | --         | --   | 31     | 23      | --   | --     | 16         | 17   | I                      | --                     | 0.8 | 2(I)       |
| <i>Polybrominated Diphenyl Ethers (PBDEs)</i>  |         |                  |                      |      |        |            |      |        |         |      |        |            |      |                        |                        |     |            |
| PBDE 47 <sup>g</sup>                           | PBDE47  | 43               | 0                    | --   | --     | --         | --   | 50     | 14      | --   | --     | 2.3        | 3.4  | I                      | --                     | 0.7 | 2(II)      |
| PBDE 99                                        | PBDE99  | 43               | 0                    | --   | --     | --         | --   | 50     | 0       | --   | --     | --         | --   |                        | --                     | 0.7 | 2(II)      |
| PBDE 100                                       | PBDE100 | 43               | 0                    | --   | --     | --         | --   | 50     | 0       | --   | --     | --         | --   |                        | --                     | 0.7 | 2(II)      |
| <i>Polychlorinated Biphenyls (PCBs)</i>        |         |                  |                      |      |        |            |      |        |         |      |        |            |      |                        |                        |     |            |
| PCB 52                                         | PCB52   | 43               | 0                    | --   | --     | --         | --   | 50     | 42      | --   | --     | 2.3        | 3.3  | I                      | --                     | 0.3 | 1, 2(I)    |
| PCB 105                                        | PCB105  | 43               | 0                    | --   | --     | --         | --   | 50     | 12      | --   | --     | 0.44       | 1.2  | I                      | --                     | 0.3 | 1, 2(I)    |
| PCB 153 <sup>f</sup>                           | PCB153  | 43               | 0                    | --   | --     | --         | --   | 50     | 4       | --   | --     | 0.31       | 1.9  |                        | --                     | 0.3 | 1, 2(I)    |
| <i>Polycyclic Aromatic Hydrocarbons (PAHs)</i> |         |                  |                      |      |        |            |      |        |         |      |        |            |      |                        |                        |     |            |
| acenaphthene                                   | AcNThe  | 43               | 100                  | 0.58 | 4.3    | 9.6        | 11   | 50     | 100     | 1.5  | 5.3    | 19         | 29   |                        | I                      | 0.3 |            |
| acenaphthylene <sup>f</sup>                    | AcNThy  | 43               | 35                   | --   | --     | 2.7        | 3.2  | 50     | 4       | --   | --     | 4.5        | 220  | O                      | --                     | 0.3 |            |
| anthracene                                     | Anth    | 43               | 14                   | --   | --     | 0.96       | 1.3  | 50     | 16      | --   | --     | 1.7        | 5.0  |                        | --                     | 0.3 |            |
| benzo(a)anthracene                             | BaA     | 43               | 0                    | --   | --     | --         | --   | 50     | 2       | --   | --     | --         | 0.66 |                        | --                     | 0.3 | 1, 2(II)   |

| Compound                              | Abbrev.  | Outdoor          |                      |      |        |            |      | Indoor |         |      |        |            |      | F.E. Test <sup>c</sup> | Wil. Test <sup>d</sup> | MRL | Ref.       |
|---------------------------------------|----------|------------------|----------------------|------|--------|------------|------|--------|---------|------|--------|------------|------|------------------------|------------------------|-----|------------|
|                                       |          | No. <sup>a</sup> | % > MRL <sup>b</sup> | Min. | Median | 95th %tile | Max. | No.    | % > MRL | Min. | Median | 95th %tile | Max. |                        |                        |     |            |
| benzo(a)pyrene                        | BaP      | 43               | 0                    | --   | --     | --         | --   | 50     | 2       | --   | --     | --         | 2.1  |                        | --                     | 0.3 | 1, 2(I)    |
| benzo(b&j)fluoranthene                | BbjFluAn | 43               | 0                    | --   | --     | --         | --   | 50     | 2       | --   | --     | --         | 2.7  |                        | --                     | 0.6 |            |
| benzo(k)fluoranthene                  | BkFluAn  | 43               | 0                    | --   | --     | --         | --   | 50     | 2       | --   | --     | --         | 1.1  |                        | --                     | 0.3 |            |
| benzothiophene                        | BThPhe   | 43               | 0                    | --   | --     | --         | --   | 50     | 0       | --   | --     | --         | --   |                        | --                     | 0.6 |            |
| chrysene/iso-chrysene                 | Chrys    | 43               | 0                    | --   | --     | --         | --   | 50     | 2       | --   | --     | --         | 0.39 |                        | --                     | 0.3 |            |
| dibenz(a,e)pyrene                     | DBaePyr  | 43               | 0                    | --   | --     | --         | --   | 50     | 0       | --   | --     | --         | --   |                        | --                     | 0.3 |            |
| dibenz(a,h)anthracene <sup>g</sup>    | DBahA    | 43               | 0                    | --   | --     | --         | --   | 50     | 0       | --   | --     | --         | --   |                        | --                     | 0.3 |            |
| 3,6-dimethyl phenanthrene             | DMPhenan | 43               | 0                    | --   | --     | --         | --   | 50     | 6       | --   | --     | 0.44       | 1.0  |                        | --                     | 0.3 |            |
| fluoranthene                          | FluAn    | 43               | 81                   | --   | 0.91   | 2.4        | 3.8  | 50     | 100     | 0.55 | 0.9    | 2.3        | 12   |                        |                        | 0.3 |            |
| fluorene                              | Flu      | 43               | 95                   | --   | 3.9    | 9.2        | 11   | 50     | 100     | 2.0  | 6.7    | 18         | 28   |                        |                        | 0.6 |            |
| indeno(1,2,3-cd)pyrene <sup>f,g</sup> | IcdPyr   | 43               | 0                    | --   | --     | --         | --   | 50     | 4       | --   | --     | 0.31       | 4.4  |                        | --                     | 0.3 |            |
| phenanthrene                          | Phenan   | 43               | 100                  | 1.5  | 6.6    | 16         | 16   | 50     | 100     | 6.1  | 11     | 29         | 44   |                        |                        | 0.9 |            |
| pyrene                                | Pyr      | 43               | 77                   | --   | 0.52   | 1.7        | 1.9  | 50     | 100     | 0.36 | 0.81   | 1.7        | 27   |                        |                        | 0.3 |            |
| dibenzothiophene                      | DBTPhe   | 43               | 7                    | --   | --     | 1.3        | 1.5  | 50     | 2       | --   | --     | --         | 10.  |                        | --                     | 0.6 |            |
| 4,6-dimethyl dibenzothiophene         | DMDBTPhe | 43               | 0                    | --   | --     | --         | --   | 50     | 18      | --   | --     | 2.2        | 4.1  |                        | --                     | 0.6 |            |
| 2-methyl dibenzothiophene             | 2MDBTPhe | 43               | 0                    | --   | --     | --         | --   | 50     | 22      | --   | --     | 4.1        | 8.5  |                        | --                     | 0.5 |            |
| 1-methyl phenanthrene                 | 1MPhenan | 43               | 63                   | --   | 0.36   | 0.85       | 1.0  | 50     | 100     | 0.45 | 1.2    | 2.9        | 4.1  |                        |                        | 0.3 |            |
| 2-methyl phenanthrene                 | 2MPhenan | 43               | 81                   | --   | 0.69   | 1.6        | 2.0  | 50     | 100     | 0.83 | 2.0    | 4.5        | 6.0  |                        |                        | 0.3 |            |
| 3-methyl phenanthrene                 | 3MPhenan | 43               | 79                   | --   | 0.61   | 1.5        | 2.0  | 50     | 100     | 0.71 | 1.8    | 4.7        | 6.6  |                        |                        | 0.3 |            |
| 9-methyl phenanthrene <sup>f</sup>    | 9MPhenan | 43               | 56                   | --   | 0.31   | 0.76       | 0.91 | 50     | 100     | 0.45 | 1.3    | 3.4        | 4.3  |                        |                        | 0.3 |            |
| <i>Pesticides</i>                     |          |                  |                      |      |        |            |      |        |         |      |        |            |      |                        |                        |     |            |
| alachlor                              | Alach    | 43               | 0                    | --   | --     | --         | --   | 50     | 0       | --   | --     | --         | --   |                        | --                     | 0.7 | 1, 2(I)    |
| aldrin                                | Aldr     | 43               | 0                    | --   | --     | --         | --   | 50     | 0       | --   | --     | --         | --   |                        | --                     | 0.7 | 1, 2(II)   |
| atrazine                              | Atraz    | 43               | 0                    | --   | --     | --         | --   | 50     | 0       | --   | --     | --         | --   |                        | --                     | 0.3 | 1, 2(I)    |
| bendiocarb                            | Bendio   | 43               | 0                    | --   | --     | --         | --   | 50     | 0       | --   | --     | --         | --   |                        | --                     | 2   |            |
| carbaryl                              | Carb     | 43               | 0                    | --   | --     | --         | --   | 50     | 0       | --   | --     | --         | --   |                        | --                     | 0.7 | 1, 2(I)    |
| carbofuran                            | Crbfur   | 43               | 0                    | --   | --     | --         | --   | 50     | 0       | --   | --     | --         | --   |                        | --                     | 0.7 | 2(II)      |
| alpha-chlordane                       | aChlor   | 43               | 2                    | --   | --     | --         | 0.81 | 50     | 26      | --   | --     | 0.5        | 3.5  |                        | --                     | 0.3 | 1, 2(I)    |
| gamma-chlordane                       | gchlor   | 43               | 2                    | --   | --     | --         | 1.1  | 50     | 32      | --   | --     | 0.65       | 4.8  |                        | --                     | 0.3 | 1, 2(I)    |
| chlorothalonil <sup>f</sup>           | Chorth   | 43               | 5                    | --   | --     | 0.46       | 1.7  | 50     | 12      | --   | --     | 6.7        | 27   |                        | --                     | 0.4 |            |
| chlorpyrifos <sup>f</sup>             | ChlPy    | 43               | 5                    | --   | --     | 0.31       | 0.86 | 50     | 56      | --   | 0.39   | 2.8        | 9.9  |                        | --                     | 0.3 | 1, 2(IIIa) |
| cyanazine                             | Cyan     | 43               | 0                    | --   | --     | --         | --   | 50     | 0       | --   | --     | --         | --   |                        | --                     | 1   | 1, 2(II)   |
| cypermethrin                          | Cyper    | 43               | 0                    | --   | --     | --         | --   | 50     | 0       | --   | --     | --         | --   |                        | --                     | 2   | 1, 2(II)   |
| 4,4'-DDD <sup>f</sup>                 | DDD      | 43               | 0                    | --   | --     | --         | --   | 50     | 4       | --   | --     | 0.31       | 0.41 |                        | --                     | 0.3 | 1, 2(I)    |
| 4,4'-DDE <sup>g</sup>                 | DDE      | 43               | 2                    | --   | --     | --         | 0.35 | 50     | 22      | --   | --     | 0.58       | 1.2  |                        | --                     | 0.3 | 12(I)      |
| 4,4'-DDT <sup>g</sup>                 | DDT      | 43               | 0                    | --   | --     | --         | --   | 50     | 24      | --   | --     | 0.74       | 1.7  |                        | --                     | 0.3 | 1, 2(I)    |

| Compound                               | Abbrev.  | Outdoor          |                      |      |        |            |      | Indoor |         |      |        |            |      | F.E. Test <sup>c</sup> | Wil. Test <sup>d</sup> | MRL | Ref.     |
|----------------------------------------|----------|------------------|----------------------|------|--------|------------|------|--------|---------|------|--------|------------|------|------------------------|------------------------|-----|----------|
|                                        |          | No. <sup>a</sup> | % > MRL <sup>b</sup> | Min. | Median | 95th %tile | Max. | No.    | % > MRL | Min. | Median | 95th %tile | Max. |                        |                        |     |          |
| diazinon                               | Diaz     | 43               | 2                    | --   | --     | --         | 2.6  | 50     | 2       | --   | --     | --         | 31   | --                     | --                     | 0.3 | 2(II)    |
| dichlorvos                             | Dclv     | 43               | 0                    | --   | --     | --         | --   | 50     | 0       | --   | --     | --         | --   | --                     | --                     | 0.7 | 2(IIIa)  |
| dicofol                                | Dico     | 43               | 0                    | --   | --     | --         | --   | 50     | 0       | --   | --     | --         | --   | --                     | --                     | 0.7 | 2(II)    |
| dieldrin                               | Dield    | 43               | 0                    | --   | --     | --         | --   | 50     | 0       | --   | --     | --         | --   | --                     | --                     | 0.7 | 1, 2(II) |
| endrin                                 | Endr     | 43               | 0                    | --   | --     | --         | --   | 50     | 0       | --   | --     | --         | --   | --                     | --                     | 0.7 | 1, 2(II) |
| ethyl parathion                        | Parath   | 43               | 0                    | --   | --     | --         | --   | 50     | 0       | --   | --     | --         | --   | --                     | --                     | 2   | 1, 2(II) |
| heptachlor <sup>f</sup>                | Hept     | 43               | 2                    | --   | --     | --         | 1.3  | 50     | 4       | --   | --     | 0.37       | 5.0  | --                     | --                     | 0.3 | 1, 2(II) |
| HPTE                                   | HPTE     | 29               | 0                    | --   | --     | --         | --   | 31     | 3       | --   | --     | --         | 3.9  | --                     | --                     | 0.8 | 1, 2(I)  |
| lindane                                | Lind     | 43               | 0                    | --   | --     | --         | --   | 50     | 0       | --   | --     | --         | --   | --                     | --                     | 0.7 | 1, 2(I)  |
| malathion                              | Malth    | 43               | 2                    | --   | --     | --         | 16   | 50     | 0       | --   | --     | --         | --   | --                     | --                     | 0.3 | 1, 2(II) |
| methoxychlor                           | MX       | 43               | 0                    | --   | --     | --         | --   | 50     | 0       | --   | --     | --         | --   | --                     | --                     | 0.7 | 1, 2(I)  |
| methyl parathion                       | MePthion | 43               | 0                    | --   | --     | --         | --   | 50     | 0       | --   | --     | --         | --   | --                     | --                     | 0.7 | 1, 2(II) |
| metolachlor                            | Metol    | 43               | 0                    | --   | --     | --         | --   | 50     | 0       | --   | --     | --         | --   | --                     | --                     | 0.3 |          |
| nitrofen                               | Nitrof   | 43               | 0                    | --   | --     | --         | --   | 50     | 0       | --   | --     | --         | --   | --                     | --                     | 0.7 | 1, 2(I)  |
| pentachlorophenol <sup>f,g</sup>       | PCPh     | 29               | 38                   | --   | --     | 2.6        | 5.8  | 31     | 42      | --   | --     | 3.3        | 11   | --                     | --                     | 0.8 | 1, 2(I)  |
| cis-permethrin <sup>f</sup>            | cPerm    | 43               | 5                    | --   | --     | 0.37       | 1.5  | 50     | 8       | --   | --     | 0.43       | 2.0  | --                     | --                     | 0.3 | 1, 2(II) |
| trans-permethrin <sup>f</sup>          | tPerm    | 43               | 2                    | --   | --     | --         | 0.73 | 50     | 4       | --   | --     | 0.62       | 3.0  | --                     | --                     | 0.6 | 1, 2(II) |
| piperonyl butoxide <sup>f</sup>        | PipBO    | 43               | 0                    | --   | --     | --         | --   | 50     | 10      | --   | --     | 1.4        | 2.3  | i                      | --                     | 0.3 | 1, 2(II) |
| o-phenyl phenol                        | oPPh     | 43               | 98                   | --   | 1.1    | 2.7        | 4.8  | 50     | 100     | 2.8  | 8.5    | 32         | 61   |                        | l                      | 0.3 | 1, 2(II) |
| prometon                               | Prom     | 43               | 0                    | --   | --     | --         | --   | 50     | 0       | --   | --     | --         | --   | --                     | --                     | 0.7 |          |
| propoxur                               | PrPx     | 43               | 0                    | --   | --     | --         | --   | 50     | 14      | --   | --     | 6.8        | 11   | l                      | --                     | 1   |          |
| simazine                               | Simz     | 43               | 0                    | --   | --     | --         | --   | 50     | 0       | --   | --     | --         | --   | --                     | --                     | 0.7 | 1, 2(II) |
| trifluralin                            | Trifl    | 43               | 2                    | --   | --     | --         | 0.54 | 50     | 0       | --   | --     | --         | --   | --                     | --                     | 0.4 | 1, 2(I)  |
| <i>Phenols and Miscellaneous</i>       |          |                  |                      |      |        |            |      |        |         |      |        |            |      |                        |                        |     |          |
| 3-biphenylol                           | mPPh     | 29               | 0                    | --   | --     | --         | --   | 31     | 0       | --   | --     | --         | --   | --                     | --                     | 0.8 |          |
| bisphenol A                            | BPA      | 29               | 14                   | --   | --     | 1.7        | 1.7  | 31     | 16      | --   | --     | 1.6        | 22   | --                     | --                     | 0.8 | 1, 2(I)  |
| bisphenol B                            | BPB      | 29               | 0                    | --   | --     | --         | --   | 31     | 0       | --   | --     | --         | --   | --                     | --                     | 0.8 | 1, 2(I)  |
| 2-sec-butylphenol                      | 2sBPh    | 29               | 0                    | --   | --     | --         | --   | 31     | 3       | --   | --     | --         | 4.1  | --                     | --                     | 0.8 |          |
| 4-sec-butylphenol                      | 4sBPh    | 29               | 0                    | --   | --     | --         | --   | 31     | 3       | --   | --     | --         | 6.8  | --                     | --                     | 2   | 1, 2(II) |
| 4-tert-butylphenol <sup>f</sup>        | 4tBPh    | 29               | 55                   | --   | 0.85   | 2.6        | 3.4  | 31     | 100     | 2.5  | 12     | 22         | 32   | l                      | l                      | 0.8 | 1, 2(II) |
| 4-cumylphenol                          | 4CPh     | 29               | 0                    | --   | --     | --         | --   | 31     | 0       | --   | --     | --         | --   | --                     | --                     | 0.8 |          |
| 2,3-dibromo-1-propanol                 | 23DB1P   | 29               | 0                    | --   | --     | --         | --   | 31     | 0       | --   | --     | --         | --   | --                     | --                     | 0.8 |          |
| 2,4-dichlorophenol <sup>f</sup>        | 24DCPh   | 29               | 7                    | --   | --     | 2.9        | 4.9  | 31     | 10      | --   | --     | 5.0        | 8.7  | --                     | --                     | 0.8 | 1, 2(II) |
| 3,4-dichlorophenol                     | 34DCPh   | 29               | 0                    | --   | --     | --         | --   | 31     | 0       | --   | --     | --         | --   | --                     | --                     | 4   |          |
| 2,4-dihydroxybenzophenone <sup>g</sup> | 24dhbzon | 29               | 3                    | --   | --     | --         | 0.96 | 31     | 0       | --   | --     | --         | --   | --                     | --                     | 0.8 | 2(I)     |

| Compound                       | Abbrev.   | Outdoor          |                      |      |        |            |      | Indoor |         |      |        |            |      | F.E. Test <sup>c</sup> | Wil. Test <sup>d</sup> | MRL | Ref.               |
|--------------------------------|-----------|------------------|----------------------|------|--------|------------|------|--------|---------|------|--------|------------|------|------------------------|------------------------|-----|--------------------|
|                                |           | No. <sup>a</sup> | % > MRL <sup>b</sup> | Min. | Median | 95th %tile | Max. | No.    | % > MRL | Min. | Median | 95th %tile | Max. |                        |                        |     |                    |
| 2-ethylhexyl 4-hydroxybenzoate | 2eh4hbenz | 29               | 0                    | --   | --     | --         | --   | 31     | 0       | --   | --     | --         | --   |                        | --                     | 0.8 |                    |
| 3-hydroxybenzophenone          | 3Hybzon   | 29               | 0                    | --   | --     | --         | --   | 31     | 0       | --   | --     | --         | --   |                        | --                     | 1   |                    |
| 4-hydroxybenzophenone          | 4Hybzon   | 29               | 0                    | --   | --     | --         | --   | 31     | 0       | --   | --     | --         | --   |                        | --                     | 2   | <sup>1</sup>       |
| 4,4'-methylenediphenol         | 44MDPh    | 29               | 0                    | --   | --     | --         | --   | 31     | 6       | --   | --     | 4.8        | 20.  |                        | --                     | 0.8 | <sup>1</sup>       |
| 4-nitrophenol <sup>9</sup>     | 4NPh      | 29               | 34                   | --   | --     | 12         | 18   | 31     | 10      | --   | --     | 9.1        | 15   | O                      | --                     | 0.8 | <sup>2(II)</sup>   |
| 4-nitrotoluene                 | 4NT       | 43               | 0                    | --   | --     | --         | --   | 50     | 0       | --   | --     | --         | --   |                        | --                     | 0.7 | <sup>1, 2(I)</sup> |
| p-pentylphenol                 | pPPh      | 29               | 0                    | --   | --     | --         | --   | 31     | 0       | --   | --     | --         | --   |                        | --                     | 0.8 | <sup>1</sup>       |
| p-phenylphenol                 | pPhPh     | 29               | 0                    | --   | --     | --         | --   | 31     | 0       | --   | --     | --         | --   |                        | --                     | 1   | <sup>1, 2(I)</sup> |

'--' indicates insufficient number of detects to calculate summary statistic

<sup>a</sup> Number of analyzed samples.

<sup>b</sup> MRL = method reporting limit (defined as the maximum of the analytical detection limit and the 90th percentile of the blanks).

<sup>c</sup> Fisher's exact test. O or I indicates significantly greater number of values above the MRL in outdoor or indoor air, respectively ( $p < 0.05$ ); o or i indicates borderline significantly greater number of values above the MRL in outdoor or indoor air, respectively ( $0.05 \leq p < 0.1$ ).

<sup>d</sup> Wilcoxon rank sum test conducted when greater than 50% of the values in each community were detected; O or I indicates significantly higher median in outdoor or indoor air, respectively ( $p < 0.05$ ); o or i indicates borderline significantly higher median in outdoor or indoor air respectively ( $0.05 \leq p < 0.1$ ); '--' indicates insufficient number of detects; blank indicates sufficient data but nonsignificant result.

<sup>e</sup> Values subjected to blank correction by subtracting the median blank concentration.

<sup>f</sup> Indicates that elevated nondetect values (due to analytical interferences) are included in summary statistics presented.

<sup>9</sup> Indicates less certainty about reported values due to at least one blank value exceeding the median of field samples.

#### References:

<sup>1</sup> Evidence of endocrine disrupting activity cited in Rudel 2001.

<sup>2</sup> Listed as a suspected endocrine disruptor by the European Commission; numbers in parentheses denote categories 1-3b. ([http://ec.europa.eu/environment/endocrine/documents/studies\\_en.htm](http://ec.europa.eu/environment/endocrine/documents/studies_en.htm))

Table S2. Summary statistics for endocrine disruptors detected in outdoor air in Richmond and Bolinas (ng/m3)

| Compound                                 | Abbrev.  | Richmond Outdoor |                      |      |        |            |      | Bolinas Outdoor |         |      |        |      | F.E. Test <sup>c</sup> | Wil. Test <sup>d</sup> |
|------------------------------------------|----------|------------------|----------------------|------|--------|------------|------|-----------------|---------|------|--------|------|------------------------|------------------------|
|                                          |          | No. <sup>a</sup> | % > MRL <sup>b</sup> | Min. | Median | 95th %tile | Max. | No.             | % > MRL | Min. | Median | Max. |                        |                        |
| <i>Phthalates</i>                        |          |                  |                      |      |        |            |      |                 |         |      |        |      |                        |                        |
| benzyl butyl phthalate <sup>e</sup>      | BBP      | 33               | 3                    | --   | --     | --         | 8.5  | 10              | 10      | --   | --     | 7.2  | --                     |                        |
| bis(2-ethylhexyl) adipate                | DEHA     | 33               | 100                  | 1.0  | 2.3    | 5.7        | 8.7  | 10              | 100     | 1.2  | 1.5    | 2.1  | R                      |                        |
| bis(2-ethylhexyl) phthalate <sup>e</sup> | DEHP     | 33               | 18                   | --   | --     | 160        | 230  | 10              | 0       | --   | --     | --   | --                     |                        |
| di-n-butyl phthalate <sup>e</sup>        | DBP      | 33               | 33                   | --   | --     | 19         | 32   | 10              | 40      | --   | --     | 15   | --                     |                        |
| di-n-hexyl phthalate                     | DHP      | 33               | 6                    | --   | --     | 6.8        | 15   | 10              | 0       | --   | --     | --   | --                     |                        |
| dicyclohexyl phthalate                   | DCP      | 33               | 6                    | --   | --     | 1.1        | 2.0  | 10              | 0       | --   | --     | --   | --                     |                        |
| diethyl phthalate <sup>e</sup>           | DEP      | 33               | 39                   | --   | --     | 150        | 610  | 10              | 70      | --   | 99     | 220  | --                     |                        |
| diisobutyl phthalate <sup>e</sup>        | DIBP     | 33               | 91                   | --   | 4.0    | 14         | 18   | 10              | 100     | 1.4  | 2.9    | 5.6  | r                      |                        |
| <i>Alkylphenols</i>                      |          |                  |                      |      |        |            |      |                 |         |      |        |      |                        |                        |
| 4-nonylphenol <sup>f</sup>               | NP       | 20               | 15                   | --   | --     | 20.        | 40.  | 9               | 11      | --   | --     | 39   | --                     |                        |
| <i>Polycyclic Aromatic Hydrocarbons</i>  |          |                  |                      |      |        |            |      |                 |         |      |        |      |                        |                        |
| acenaphthene                             | AcNThe   | 33               | 100                  | 2    | 4.8    | 9.7        | 11   | 10              | 100     | 0.58 | 0.81   | 4.6  | R                      |                        |
| acenaphthylene                           | AcNThy   | 33               | 45                   | --   | --     | 2.7        | 3.2  | 10              | 0       | --   | --     | --   | R                      |                        |
| anthracene                               | Anth     | 33               | 15                   | --   | --     | 0.8        | 1.3  | 10              | 10      | --   | --     | 1.1  | --                     |                        |
| fluoranthene                             | FluAn    | 33               | 100                  | 0.41 | 1.0    | 2.3        | 2.7  | 10              | 20      | --   | --     | 3.8  | R                      |                        |
| fluorene                                 | Flu      | 33               | 97                   | --   | 5.5    | 9.4        | 11   | 10              | 90      | --   | 1.1    | 5.6  | R                      |                        |
| phenanthrene                             | Phenan   | 33               | 100                  | 3.1  | 8.6    | 16         | 16   | 10              | 100     | 1.5  | 2.2    | 15   | R                      |                        |
| pyrene                                   | Pyr      | 33               | 97                   | --   | 0.62   | 1.6        | 1.9  | 10              | 10      | --   | --     | 1.9  | R                      |                        |
| dibenzothiophene                         | DBTPhe   | 33               | 9                    | --   | --     | 1.3        | 1.5  | 10              | 0       | --   | --     | --   | --                     |                        |
| 1-methyl phenanthrene                    | 1MPhenan | 33               | 79                   | --   | 0.42   | 0.88       | 1.0  | 10              | 10      | --   | --     | 0.67 | R                      |                        |
| 2-methyl phenanthrene                    | 2MPhenan | 33               | 100                  | 0.35 | 0.76   | 1.7        | 2.0  | 10              | 20      | --   | --     | 1.2  | R                      |                        |
| 3-methyl phenanthrene                    | 3MPhenan | 33               | 97                   | --   | 0.69   | 1.6        | 2.0  | 10              | 20      | --   | --     | 1.2  | R                      |                        |
| 9-methyl phenanthrene                    | 9MPhenan | 33               | 70                   | --   | 0.34   | 0.78       | 0.91 | 10              | 10      | --   | --     | 0.45 | R                      |                        |
| <i>Pesticides</i>                        |          |                  |                      |      |        |            |      |                 |         |      |        |      |                        |                        |
| alpha-chlordane                          | aChlor   | 33               | 0                    | --   | --     | --         | --   | 10              | 10      | --   | --     | 0.81 | --                     |                        |
| gamma-chlordane                          | gchlor   | 33               | 0                    | --   | --     | --         | --   | 10              | 10      | --   | --     | 1.1  | --                     |                        |
| chlorothalonil                           | Chorth   | 33               | 3                    | --   | --     | --         | 0.47 | 10              | 10      | --   | --     | 1.7  | --                     |                        |
| chlorpyrifos                             | ChIPy    | 33               | 6                    | --   | --     | 0.45       | 0.86 | 10              | 0       | --   | --     | --   | --                     |                        |
| 4,4'-DDE                                 | DDE      | 33               | 3                    | --   | --     | --         | 0.35 | 10              | 0       | --   | --     | --   | --                     |                        |
| diazinon                                 | Diaz     | 33               | 3                    | --   | --     | --         | 2.6  | 10              | 0       | --   | --     | --   | --                     |                        |
| heptachlor                               | Hept     | 33               | 0                    | --   | --     | --         | --   | 10              | 10      | --   | --     | 1.3  | --                     |                        |
| malathion                                | Malth    | 33               | 3                    | --   | --     | --         | 16   | 10              | 0       | --   | --     | --   | --                     |                        |
| pentachlorophenol <sup>f</sup>           | PCPh     | 20               | 55                   | --   | 0.85   | 2.8        | 5.8  | 9               | 0       | --   | --     | --   | R                      |                        |

| Compound                         | Abbrev.  | Richmond Outdoor |                      |      |        |            |      | Bolinas Outdoor |         |      |        |      | F.E. Test <sup>c</sup> | Wil. Test <sup>d</sup> |
|----------------------------------|----------|------------------|----------------------|------|--------|------------|------|-----------------|---------|------|--------|------|------------------------|------------------------|
|                                  |          | No. <sup>a</sup> | % > MRL <sup>b</sup> | Min. | Median | 95th %tile | Max. | No.             | % > MRL | Min. | Median | Max. |                        |                        |
| cis-permethrin <sup>f</sup>      | cPerm    | 33               | 6                    | --   | --     | 0.51       | 1.5  | 10              | 0       | --   | --     | --   | --                     | --                     |
| trans-permethrin                 | tPerm    | 33               | 3                    | --   | --     | --         | 0.73 | 10              | 0       | --   | --     | --   | --                     | --                     |
| o-phenyl phenol                  | oPPh     | 33               | 100                  | 0.38 | 1.2    | 2.8        | 4.8  | 10              | 90      | --   | 0.52   | 1.1  | --                     | R                      |
| trifluralin                      | Trifl    | 33               | 0                    | --   | --     | --         | --   | 10              | 10      | --   | --     | 0.54 | --                     | --                     |
| <i>Phenols and Miscellaneous</i> |          |                  |                      |      |        |            |      |                 |         |      |        |      |                        |                        |
| bisphenol A                      | BPA      | 20               | 15                   | --   | --     | 1.7        | 1.7  | 9               | 11      | --   | --     | 1.7  | --                     | --                     |
| 4-tert-butylphenol <sup>f</sup>  | 4tBPh    | 20               | 60                   | --   | 0.85   | 2.7        | 3.4  | 9               | 44      | --   | --     | 0.85 | --                     | --                     |
| 2,4-dichlorophenol               | 24DCPh   | 20               | 10                   | --   | --     | 4.2        | 4.9  | 9               | 0       | --   | --     | --   | --                     | --                     |
| 2,4-dihydroxybenzophenone        | 24dhbzon | 20               | 5                    | --   | --     | --         | 0.96 | 9               | 0       | --   | --     | --   | --                     | --                     |
| 4-nitrophenol                    | 4NPh     | 20               | 45                   | --   | --     | 13         | 18   | 9               | 11      | --   | --     | 2.1  | --                     | --                     |

'--' indicates insufficient number of detects to calculate summary statistic

<sup>a</sup> Number of analyzed samples.

<sup>b</sup> MRL = method reporting limit (defined as the maximum of the analytical detection limit and the 90th percentile of the blanks). Compound-specific MRLs presented in Supporting Information.

<sup>c</sup> Fisher's exact test. R or B indicates significantly greater number of values above the MRL in Richmond or Bolinas, respectively ( $p < 0.05$ ); r or b indicates borderline significantly greater number of values above the MRL in Richmond or Bolinas, respectively ( $0.05 \leq p < 0.1$ ).

<sup>d</sup> Wilcoxon rank sum test conducted when greater than 50% of the values in each community were detected; R or B indicates significantly higher median in Richmond or Bolinas respectively ( $p < 0.05$ ); r or b indicates borderline significantly higher median in Richmond or Bolinas, respectively ( $0.05 \leq p < 0.1$ ); '--' indicates insufficient number of detects

<sup>e</sup> Values subjected to blank correction by subtracting the median blank concentration.

<sup>f</sup> Indicates that elevated nondetect values (due to analytical interferences) are included in summary statistics presented

Table S3. Summary statistics for endocrine disruptors detected in indoor air in Richmond and Bolinas (ng/m3)

| Compound                                       | Abbrev.  | Richmond Indoor  |                      |      |        |            |      | Bolinas Indoor |         |      |        |      | F.E. Test <sup>c</sup> | Wil. Test <sup>d</sup> |
|------------------------------------------------|----------|------------------|----------------------|------|--------|------------|------|----------------|---------|------|--------|------|------------------------|------------------------|
|                                                |          | No. <sup>a</sup> | % > MRL <sup>b</sup> | Min. | Median | 95th %tile | Max. | No.            | % > MRL | Min. | Median | Max. |                        |                        |
| <i>Phthalates</i>                              |          |                  |                      |      |        |            |      |                |         |      |        |      |                        |                        |
| benzyl butyl phthalate <sup>e</sup>            | BBP      | 40               | 52                   | --   | 7.5    | 41         | 80   | 10             | 40      | --   | --     | 15   |                        | --                     |
| bis(2-ethylhexyl) adipate                      | DEHA     | 40               | 100                  | 8.3  | 32     | 70.        | 76   | 10             | 100     | 6.9  | 23     | 69   |                        |                        |
| bis(2-ethylhexyl) phthalate <sup>e</sup>       | DEHP     | 40               | 90                   | --   | 69     | 130        | 200  | 10             | 50      | --   | 47     | 100  | R                      | R                      |
| di-n-butyl phthalate <sup>e</sup>              | DBP      | 40               | 100                  | 28   | 140    | 650        | 1100 | 10             | 100     | 88   | 140    | 310  |                        |                        |
| di-n-hexyl phthalate                           | DHP      | 40               | 2                    | --   | --     | --         | 52   | 10             | 0       | --   | --     | --   |                        | --                     |
| di-n-octyl phthalate                           | DOP      | 40               | 2                    | --   | --     | --         | 0.8  | 10             | 0       | --   | --     | --   |                        | --                     |
| di-n-pentyl phthalate                          | DPeP     | 40               | 2                    | --   | --     | --         | 4.0  | 10             | 0       | --   | --     | --   |                        | --                     |
| di-n-propyl phthalate                          | DPP      | 40               | 2                    | --   | --     | --         | 2.3  | 10             | 0       | --   | --     | --   |                        | --                     |
| diethyl phthalate <sup>e</sup>                 | DEP      | 40               | 100                  | 130  | 330    | 1400       | 2500 | 10             | 100     | 110  | 320    | 930  |                        |                        |
| diisobutyl phthalate <sup>e</sup>              | DIBP     | 40               | 100                  | 17   | 140    | 390        | 1700 | 10             | 100     | 23   | 81     | 250  |                        | R                      |
| <i>Alkylphenols</i>                            |          |                  |                      |      |        |            |      |                |         |      |        |      |                        |                        |
| 4-nonylphenol                                  | NP       | 21               | 95                   | --   | 53     | 82         | 89   | 10             | 100     | 26   | 49     | 89   |                        |                        |
| nonylphenol monoethoxylate                     | NP1EO    | 21               | 95                   | --   | 19     | 35         | 36   | 10             | 100     | 13   | 29     | 72   |                        |                        |
| nonylphenol diethoxylate                       | NP2EO    | 21               | 0                    | --   | --     | --         | --   | 10             | 10      | --   | --     | 18   |                        | --                     |
| <i>Parabens</i>                                |          |                  |                      |      |        |            |      |                |         |      |        |      |                        |                        |
| butyl paraben                                  | BuPa     | 21               | 5                    | --   | --     | --         | 5.8  | 10             | 0       | --   | --     | --   |                        | --                     |
| methyl paraben                                 | MePa     | 21               | 33                   | --   | --     | 16         | 17   | 10             | 0       | --   | --     | --   | r                      | --                     |
| <i>Polybrominated Diphenyl Ethers (PBDEs)</i>  |          |                  |                      |      |        |            |      |                |         |      |        |      |                        |                        |
| PBDE 47                                        | PBDE47   | 40               | 18                   | --   | --     | 2.3        | 3.4  | 10             | 0       | --   | --     | --   |                        | --                     |
| <i>Polychlorinated Biphenyls (PCBs)</i>        |          |                  |                      |      |        |            |      |                |         |      |        |      |                        |                        |
| PCB 52 <sup>f</sup>                            | PCB52    | 40               | 40                   | --   | --     | 1.6        | 2.7  | 10             | 50      | --   | 0.30   | 3.3  |                        | --                     |
| PCB 105                                        | PCB105   | 40               | 15                   | --   | --     | 0.48       | 1.2  | 10             | 0       | --   | --     | --   |                        | --                     |
| PCB 153                                        | PCB153   | 40               | 5                    | --   | --     | 0.33       | 1.9  | 10             | 0       | --   | --     | --   |                        | --                     |
| <i>Polycyclic Aromatic Hydrocarbons (PAHs)</i> |          |                  |                      |      |        |            |      |                |         |      |        |      |                        |                        |
| acenaphthene                                   | AcNThe   | 40               | 100                  | 2.8  | 6.1    | 19         | 29   | 10             | 100     | 1.5  | 3.4    | 8.9  |                        | R                      |
| acenaphthylene                                 | AcNThy   | 40               | 5                    | --   | --     | 6.7        | 220  | 10             | 0       | --   | --     | --   |                        | --                     |
| anthracene                                     | Anth     | 40               | 20                   | --   | --     | 1.8        | 5.0  | 10             | 0       | --   | --     | --   |                        | --                     |
| benzo(a)anthracene                             | BaA      | 40               | 2                    | --   | --     | --         | 0.66 | 10             | 0       | --   | --     | --   |                        | --                     |
| benzo(a)pyrene                                 | BaP      | 40               | 2                    | --   | --     | --         | 2.1  | 10             | 0       | --   | --     | --   |                        | --                     |
| benzo(b&j)fluoranthene                         | BbjFluAn | 40               | 2                    | --   | --     | --         | 2.7  | 10             | 0       | --   | --     | --   |                        | --                     |
| benzo(k)fluoranthene                           | BkFluAn  | 40               | 2                    | --   | --     | --         | 1.1  | 10             | 0       | --   | --     | --   |                        | --                     |
| chrysene/iso-chrysene                          | Chrys    | 40               | 2                    | --   | --     | --         | 0.39 | 10             | 0       | --   | --     | --   |                        | --                     |

| Compound                         | Abbrev.  | Richmond Indoor  |                      |      |        |            |      | Bolin Indoor |         |      |        |      | F.E. Test <sup>c</sup> | Wil. Test <sup>d</sup> |
|----------------------------------|----------|------------------|----------------------|------|--------|------------|------|--------------|---------|------|--------|------|------------------------|------------------------|
|                                  |          | No. <sup>a</sup> | % > MRL <sup>b</sup> | Min. | Median | 95th %tile | Max. | No.          | % > MRL | Min. | Median | Max. |                        |                        |
| 3,6-dimethyl phenanthrene        | DMPPhen  | 40               | 5                    | --   | --     | 0.32       | 1.0  | 10           | 10      | --   | --     | 0.55 |                        | --                     |
| fluoranthene                     | FluAn    | 40               | 100                  | 0.56 | 0.98   | 2.6        | 12   | 10           | 100     | 0.55 | 0.68   | 1.5  |                        | R                      |
| fluorene                         | Flu      | 40               | 100                  | 3.8  | 8.1    | 19         | 28   | 10           | 100     | 2.0  | 5.2    | 12   |                        | R                      |
| indeno(1,2,3-cd)pyrene           | lcdPyr   | 40               | 5                    | --   | --     | 0.33       | 4.4  | 10           | 0       | --   | --     | --   |                        | --                     |
| phenanthrene                     | Phenan   | 40               | 100                  | 6.1  | 12     | 30.        | 44   | 10           | 100     | 6.5  | 9.7    | 18   |                        | R                      |
| pyrene                           | Pyr      | 40               | 100                  | 0.36 | 0.9    | 2.3        | 27   | 10           | 100     | 0.4  | 0.71   | 0.97 |                        | R                      |
| dibenzothiophene                 | DBTPhe   | 40               | 0                    | --   | --     | --         | --   | 10           | 10      | --   | --     | 2.9  |                        | --                     |
| 4,6-dimethyl dibenzothiophene    | DMDBTPhe | 40               | 22                   | --   | --     | 2.4        | 4.1  | 10           | 0       | --   | --     | --   |                        | --                     |
| 2-methyl dibenzothiophene        | 2MDBTPhe | 40               | 28                   | --   | --     | 4.4        | 8.5  | 10           | 0       | --   | --     | --   | r                      | --                     |
| 1-methyl phenanthrene            | 1MPPhen  | 40               | 100                  | 0.45 | 1.3    | 2.7        | 4.1  | 10           | 100     | 0.75 | 1.0    | 3.0  |                        |                        |
| 2-methyl phenanthrene            | 2MPPhen  | 40               | 100                  | 0.83 | 2.1    | 4.2        | 6.0  | 10           | 100     | 1.1  | 1.5    | 4.8  |                        |                        |
| 3-methyl phenanthrene            | 3MPPhen  | 40               | 100                  | 0.71 | 1.8    | 4.8        | 6.6  | 10           | 100     | 1.2  | 1.7    | 4.8  |                        |                        |
| 9-methyl phenanthrene            | 9MPPhen  | 40               | 100                  | 0.45 | 1.3    | 3.6        | 4.3  | 10           | 100     | 0.73 | 1.2    | 3.2  |                        |                        |
| <i>Pesticides</i>                |          |                  |                      |      |        |            |      |              |         |      |        |      |                        |                        |
| alpha-chlordane                  | aChlor   | 40               | 25                   | --   | --     | 0.41       | 0.67 | 10           | 30      | --   | --     | 3.5  |                        | --                     |
| gamma-chlordane                  | gchlor   | 40               | 32                   | --   | --     | 0.56       | 1.1  | 10           | 30      | --   | --     | 4.8  |                        | --                     |
| chlorothalonil                   | Chorth   | 40               | 12                   | --   | --     | 8.5        | 27   | 10           | 10      | --   | --     | 0.46 |                        | --                     |
| chlorpyrifos                     | ChlPy    | 40               | 60                   | --   | 0.47   | 2.9        | 9.9  | 10           | 40      | --   | --     | 1.0  |                        | --                     |
| 4,4'-DDD <sup>f</sup>            | DDD      | 40               | 5                    | --   | --     | 0.32       | 0.41 | 10           | 0       | --   | --     | --   |                        | --                     |
| 4,4'-DDE                         | DDE      | 40               | 28                   | --   | --     | 0.64       | 1.2  | 10           | 0       | --   | --     | --   | r                      | --                     |
| 4,4'-DDT                         | DDT      | 40               | 30                   | --   | --     | 0.76       | 1.7  | 10           | 0       | --   | --     | --   | r                      | --                     |
| diazinon                         | Diaz     | 40               | 2                    | --   | --     | --         | 31   | 10           | 0       | --   | --     | --   |                        | --                     |
| heptachlor                       | Hept     | 40               | 0                    | --   | --     | --         | --   | 10           | 20      | --   | --     | 5.0  | B                      | --                     |
| HPTE                             | HPTE     | 21               | 5                    | --   | --     | --         | 2.4  | 10           | 0       | --   | --     | --   |                        | --                     |
| pentachlorophenol <sup>f</sup>   | PCPh     | 21               | 33                   | --   | --     | 3.3        | 3.3  | 10           | 60      | --   | 0.84   | 11   |                        | --                     |
| cis-permethrin                   | cPerm    | 40               | 10                   | --   | --     | 0.50       | 2.0  | 10           | 0       | --   | --     | --   |                        | --                     |
| trans-permethrin                 | tPerm    | 40               | 5                    | --   | --     | 0.63       | 3.0  | 10           | 0       | --   | --     | --   |                        | --                     |
| piperonyl butoxide <sup>f</sup>  | PipBO    | 40               | 12                   | --   | --     | 1.5        | 2.3  | 10           | 0       | --   | --     | --   |                        | --                     |
| o-phenyl phenol                  | oPPh     | 40               | 100                  | 2.8  | 8.3    | 40.        | 61   | 10           | 100     | 3.0  | 13     | 19   |                        |                        |
| propoxur                         | PrPx     | 40               | 18                   | --   | --     | 7.0        | 11   | 10           | 0       | --   | --     | --   |                        | --                     |
| <i>Phenols and Miscellaneous</i> |          |                  |                      |      |        |            |      |              |         |      |        |      |                        |                        |
| bisphenol A                      | BPA      | 21               | 19                   | --   | --     | 1.7        | 22   | 10           | 10      | --   | --     | 0.85 |                        | --                     |
| 2-sec-butylphenol                | 2sBPh    | 21               | 5                    | --   | --     | --         | 2.4  | 10           | 0       | --   | --     | --   |                        | --                     |
| 4-sec-butylphenol                | 4sBPh    | 21               | 5                    | --   | --     | --         | 5.8  | 10           | 0       | --   | --     | --   |                        | --                     |
| 4-tert-butylphenol               | 4tBPh    | 21               | 100                  | 3.2  | 12     | 19         | 25   | 10           | 100     | 2.5  | 11     | 32   |                        |                        |
| 2,4-dichlorophenol <sup>f</sup>  | 24DCPh   | 21               | 14                   | --   | --     | 5.1        | 8.7  | 10           | 0       | --   | --     | --   |                        | --                     |



| Compound               | Abbrev. | Richmond Indoor  |                      |      |        |            |      | Bolinás Indoor |         |      |        |      | F.E. Test <sup>c</sup> | Wil. Test <sup>d</sup> |
|------------------------|---------|------------------|----------------------|------|--------|------------|------|----------------|---------|------|--------|------|------------------------|------------------------|
|                        |         | No. <sup>a</sup> | % > MRL <sup>b</sup> | Min. | Median | 95th %tile | Max. | No.            | % > MRL | Min. | Median | Max. |                        |                        |
| 4,4'-methylenediphenol | 44MDPh  | 21               | 10                   | --   | --     | 8.8        | 20   | 10             | 0       | --   | --     | --   | --                     | --                     |
| 4-nitrophenol          | 4NPh    | 21               | 10                   | --   | --     | 9.7        | 15   | 10             | 10      | --   | --     | 8.6  | --                     | --                     |

'--' indicates insufficient number of detects to calculate summary statistic

<sup>a</sup> Number of analyzed samples.

<sup>b</sup> MRL = method reporting limit (defined as the maximum of the analytical detection limit and the 90th percentile of the blanks). Compound-specific MRLs presented in Table S1.

<sup>c</sup> Fisher's exact test. R or B indicates significantly greater number of values above the MRL in Richmond or Bolinas, respectively ( $p < 0.05$ ); r or b indicates borderline significantly greater number of values above the MRL in Richmond or Bolinas, respectively ( $0.05 \leq p < 0.1$ ).

<sup>d</sup> Wilcoxon rank sum test conducted when greater than 50% of the values in each community were detected; R or B indicates significantly higher median in Richmond or Bolinas respectively ( $p < 0.05$ ); r or b indicates borderline significantly higher median in Richmond or Bolinas, respectively ( $0.05 \leq p < 0.1$ ); '--' indicates insufficient number of detects; blank indicates sufficient data but nonsignificant result

<sup>e</sup> Values subjected to blank correction by subtracting the median blank concentration.

<sup>f</sup> Indicates that elevated nondetect values (due to analytical interferences) are included in summary statistics presented

Table S4. Quality assurance and quality control (QA/QC) summary data.

| Compound                                       | Blanks                      |                          |                              |                                   |                                         |                                         |                                          |                          |                                     | Duplicates        |                                     |                        | Matrix Spike Recoveries   |                           |                              |
|------------------------------------------------|-----------------------------|--------------------------|------------------------------|-----------------------------------|-----------------------------------------|-----------------------------------------|------------------------------------------|--------------------------|-------------------------------------|-------------------|-------------------------------------|------------------------|---------------------------|---------------------------|------------------------------|
|                                                | Blank Correct. <sup>a</sup> | Blank Correct. Mass (ng) | Blank Correct. Conc. (ng/m3) | Change in Median (%) <sup>b</sup> | Field Blank Max. Mass (ng) <sup>c</sup> | Batch Blank Max. Mass (ng) <sup>d</sup> | Matrix Blank Max. Mass (ng) <sup>e</sup> | MRL (ng/m3) <sup>f</sup> | Max.-based MRL (ng/m3) <sup>g</sup> | No. of Dup. Pairs | No. of Det. Dup. Pairs <sup>n</sup> | Mean Percent Diff. (%) | Matrix Spike Recov. 1 (%) | Matrix Spike Recov. 2 (%) | Ave. Matrix Spike Recov. (%) |
| <i>Phthalates</i>                              |                             |                          |                              |                                   |                                         |                                         |                                          |                          |                                     |                   |                                     |                        |                           |                           |                              |
| benzyl butyl phthalate <sup>i</sup>            | yes                         | 33                       | 2.7                          | 53                                | 130                                     | 150                                     | 56                                       | 6                        | 10                                  | 4                 | 4                                   | 27                     | 78                        | 83                        | 81                           |
| bis(2-ethylhexyl) adipate <sup>i</sup>         | no                          | <DL                      | <DL                          | --                                | 11                                      | 3200                                    | 13                                       | 1                        | 300                                 | 4                 | 4                                   | 11                     | 64                        | 80                        | 72                           |
| bis(2-ethylhexyl) phthalate <sup>i</sup>       | yes                         | 120                      | 9.5                          | 19                                | 160                                     | 3800                                    | 190                                      | 40                       | 300                                 | 4                 | 4                                   | 11                     | 67                        | 79                        | 73                           |
| di-n-butyl phthalate                           | yes                         | 62                       | 5.1                          | 7                                 | 140                                     | 190                                     | 160                                      | 7                        | 20                                  | 4                 | 4                                   | 30                     | 77                        | 99                        | 88                           |
| di-n-hexyl phthalate <sup>i</sup>              | no                          | <DL                      | <DL                          | --                                | 79                                      | 440                                     | <DL                                      | 6                        | 40                                  | 4                 | 1                                   | 7                      | 73                        | 84                        | 79                           |
| di-n-octyl phthalate <sup>i</sup>              | no                          | <DL                      | <DL                          | --                                | <DL                                     | 38                                      | <DL                                      | 0.7                      | 3                                   | 4                 | 0                                   | --                     | 96                        | 74                        | 85                           |
| di-n-pentyl phthalate                          | no                          | <DL                      | <DL                          | --                                | <DL                                     | <DL                                     | <DL                                      | 0.7                      | 0.7                                 | 4                 | 0                                   | --                     | 94                        | 97                        | 96                           |
| di-n-propyl phthalate                          | no                          | <DL                      | <DL                          | --                                | <DL                                     | <DL                                     | <DL                                      | 1                        | 1                                   | 4                 | 0                                   | --                     | 89                        | 89                        | 89                           |
| dicyclohexyl phthalate <sup>i</sup>            | no                          | <DL                      | <DL                          | --                                | <DL                                     | 84                                      | <DL                                      | 0.7                      | 7                                   | 4                 | 0                                   | --                     | 70                        | 76                        | 73                           |
| diethyl phthalate                              | yes                         | 440                      | 37                           | 17                                | 1600                                    | 840                                     | 440                                      | 60                       | 100                                 | 4                 | 4                                   | 28                     | 85                        | 117                       | 101                          |
| diisobutyl phthalate                           | yes                         | 21                       | 1.7                          | 5                                 | 31                                      | 39                                      | 45                                       | 1                        | 4                                   | 4                 | 4                                   | 23                     | 84                        | 86                        | 85                           |
| <i>Alkylphenols</i>                            |                             |                          |                              |                                   |                                         |                                         |                                          |                          |                                     |                   |                                     |                        |                           |                           |                              |
| 4-nonylphenol <sup>i</sup>                     | no                          | <DL                      | <DL                          | --                                | 100                                     | 340                                     | <DL                                      | 10                       | 30                                  | 1                 | 1                                   | 8                      | 74                        | 64                        | 69                           |
| nonylphenol monoethoxylate                     | no                          | <DL                      | <DL                          | --                                | <DL                                     | <DL                                     | <DL                                      | 6                        | 6                                   | 1                 | 1                                   | 4                      | 59                        | 71                        | 65                           |
| nonylphenol diethoxylate                       | no                          | <DL                      | <DL                          | --                                | <DL                                     | <DL                                     | <DL                                      | 7                        | 7                                   | 1                 | 1                                   | 20                     | 91                        | 84                        | 88                           |
| <i>Parabens</i>                                |                             |                          |                              |                                   |                                         |                                         |                                          |                          |                                     |                   |                                     |                        |                           |                           |                              |
| butyl paraben                                  | no                          | <DL                      | <DL                          | --                                | <DL                                     | <DL                                     | <DL                                      | 0.8                      | 0.8                                 | 1                 | 0                                   | --                     | 59                        | 60                        | 59                           |
| ethyl paraben                                  | no                          | <DL                      | <DL                          | --                                | <DL                                     | <DL                                     | <DL                                      | 0.8                      | 0.8                                 | 1                 | 0                                   | --                     | 99                        | 81                        | 90                           |
| methyl paraben                                 | no                          | <DL                      | <DL                          | --                                | <DL                                     | <DL                                     | <DL                                      | 0.8                      | 0.8                                 | 1                 | 0                                   | --                     | 85                        | 80                        | 82                           |
| <i>Polybrominated Diphenyl Ethers (PBDEs)</i>  |                             |                          |                              |                                   |                                         |                                         |                                          |                          |                                     |                   |                                     |                        |                           |                           |                              |
| PBDE 47 <sup>i</sup>                           | no                          | <DL                      | <DL                          | --                                | <DL                                     | 15                                      | <DL                                      | 0.7                      | 1                                   | 4                 | 0                                   | --                     | --                        | --                        | --                           |
| PBDE 99                                        | no                          | <DL                      | <DL                          | --                                | <DL                                     | <DL                                     | <DL                                      | 0.7                      | 0.7                                 | 4                 | 0                                   | --                     | --                        | --                        | --                           |
| PBDE 100                                       | no                          | <DL                      | <DL                          | --                                | <DL                                     | <DL                                     | <DL                                      | 0.7                      | 0.7                                 | 4                 | 0                                   | --                     | --                        | --                        | --                           |
| <i>Polychlorinated Biphenyls (PBCs)</i>        |                             |                          |                              |                                   |                                         |                                         |                                          |                          |                                     |                   |                                     |                        |                           |                           |                              |
| PCB 52                                         | no                          | <DL                      | <DL                          | --                                | <DL                                     | <DL                                     | <DL                                      | 0.3                      | 0.3                                 | 4                 | 1                                   | 7                      | 112                       | 95                        | 104                          |
| PCB 105                                        | no                          | <DL                      | <DL                          | --                                | <DL                                     | <DL                                     | <DL                                      | 0.3                      | 0.3                                 | 4                 | 0                                   | --                     | 99                        | 88                        | 94                           |
| PCB 153                                        | no                          | <DL                      | <DL                          | --                                | <DL                                     | <DL                                     | <DL                                      | 0.3                      | 0.3                                 | 4                 | 0                                   | --                     | 104                       | 92                        | 98                           |
| <i>Polycyclic Aromatic Hydrocarbons (PAHs)</i> |                             |                          |                              |                                   |                                         |                                         |                                          |                          |                                     |                   |                                     |                        |                           |                           |                              |
| acenaphthene                                   | no                          | <DL                      | <DL                          | --                                | <DL                                     | <DL                                     | <DL                                      | 0.3                      | 0.3                                 | 4                 | 4                                   | 15                     | 89                        | 94                        | 92                           |
| acenaphthylene                                 | no                          | <DL                      | <DL                          | --                                | <DL                                     | <DL                                     | <DL                                      | 0.3                      | 0.3                                 | 4                 | 0                                   | --                     | 94                        | 85                        | 90                           |
| anthracene                                     | no                          | <DL                      | <DL                          | --                                | <DL                                     | <DL                                     | <DL                                      | 0.3                      | 0.3                                 | 4                 | 1                                   | 86                     | 91                        | 86                        | 89                           |
| benzo(a)anthracene                             | no                          | <DL                      | <DL                          | --                                | <DL                                     | <DL                                     | <DL                                      | 0.3                      | 0.3                                 | 4                 | 0                                   | --                     | 103                       | 96                        | 100                          |

| Compound                            | Blanks                      |                          |                              |                                   |                                         |                                         |                                          |                          |                                     | Duplicates        |                                     |                        | Matrix Spike Recoveries   |                           |                              |
|-------------------------------------|-----------------------------|--------------------------|------------------------------|-----------------------------------|-----------------------------------------|-----------------------------------------|------------------------------------------|--------------------------|-------------------------------------|-------------------|-------------------------------------|------------------------|---------------------------|---------------------------|------------------------------|
|                                     | Blank Correct. <sup>a</sup> | Blank Correct. Mass (ng) | Blank Correct. Conc. (ng/m3) | Change in Median (%) <sup>b</sup> | Field Blank Max. Mass (ng) <sup>c</sup> | Batch Blank Max. Mass (ng) <sup>d</sup> | Matrix Blank Max. Mass (ng) <sup>e</sup> | MRL (ng/m3) <sup>f</sup> | Max.-based MRL (ng/m3) <sup>g</sup> | No. of Dup. Pairs | No. of Det. Dup. Pairs <sup>h</sup> | Mean Percent Diff. (%) | Matrix Spike Recov. 1 (%) | Matrix Spike Recov. 2 (%) | Ave. Matrix Spike Recov. (%) |
| benzo(a)pyrene                      | no                          | <DL                      | <DL                          | --                                | <DL                                     | <DL                                     | <DL                                      | 0.3                      | 0.3                                 | 4                 | 0                                   | --                     | 82                        | 77                        | 80                           |
| benzo(b&j)fluoranthene              | no                          | <DL                      | <DL                          | --                                | <DL                                     | <DL                                     | <DL                                      | 0.6                      | 0.6                                 | 4                 | 0                                   | --                     | 83                        | 73                        | 78                           |
| benzo(k)fluoranthene                | no                          | <DL                      | <DL                          | --                                | <DL                                     | <DL                                     | <DL                                      | 0.3                      | 0.3                                 | 4                 | 0                                   | --                     | 87                        | 80                        | 84                           |
| benzothiophene                      | no                          | <DL                      | <DL                          | --                                | <DL                                     | <DL                                     | <DL                                      | 0.6                      | 0.6                                 | 4                 | 0                                   | --                     | 86                        | 90                        | 88                           |
| chrysene/iso-chrysene               | no                          | <DL                      | <DL                          | --                                | <DL                                     | <DL                                     | <DL                                      | 0.3                      | 0.3                                 | 4                 | 0                                   | --                     | 96                        | 100                       | 98                           |
| dibenz(a,e)pyrene                   | no                          | <DL                      | <DL                          | --                                | <DL                                     | <DL                                     | <DL                                      | 0.3                      | 0.3                                 | 4                 | 0                                   | --                     | 167                       | 66                        | 117                          |
| dibenz(a,h)anthracene <sup>i</sup>  | no                          | <DL                      | <DL                          | --                                | <DL                                     | 23                                      | <DL                                      | 0.3                      | 2                                   | 4                 | 0                                   | --                     | 98                        | 75                        | 87                           |
| 3,6-dimethyl phenanthrene           | no                          | <DL                      | <DL                          | --                                | <DL                                     | <DL                                     | <DL                                      | 0.3                      | 0.3                                 | 4                 | 0                                   | --                     | 97                        | 97                        | 97                           |
| fluoranthene                        | no                          | <DL                      | <DL                          | --                                | <DL                                     | <DL                                     | <DL                                      | 0.3                      | 0.3                                 | 4                 | 4                                   | 6                      | 103                       | 97                        | 100                          |
| fluorene                            | no                          | <DL                      | <DL                          | --                                | 8.1                                     | 11                                      | <DL                                      | 0.6                      | 0.9                                 | 4                 | 4                                   | 19                     | 92                        | 89                        | 91                           |
| indeno(1,2,3-cd)pyrene <sup>i</sup> | no                          | <DL                      | <DL                          | --                                | <DL                                     | 8.6                                     | <DL                                      | 0.3                      | 0.7                                 | 4                 | 0                                   | --                     | 91                        | 70                        | 81                           |
| phenanthrene                        | no                          | <DL                      | <DL                          | --                                | 15                                      | 9.3                                     | <DL                                      | 0.9                      | 1                                   | 4                 | 4                                   | 13                     | 95                        | 95                        | 95                           |
| pyrene                              | no                          | <DL                      | <DL                          | --                                | <DL                                     | <DL                                     | <DL                                      | 0.3                      | 0.3                                 | 4                 | 4                                   | 12                     | 103                       | 99                        | 101                          |
| dibenzothiophene                    | no                          | <DL                      | <DL                          | --                                | <DL                                     | <DL                                     | <DL                                      | 0.6                      | 0.6                                 | 4                 | 2                                   | 19                     | 92                        | 90                        | 91                           |
| 4,6-dimethyl dibenzothiophene       | no                          | <DL                      | <DL                          | --                                | <DL                                     | <DL                                     | <DL                                      | 0.6                      | 0.6                                 | 4                 | 1                                   | 31                     | 96                        | 98                        | 97                           |
| 2-methyl dibenzothiophene           | no                          | <DL                      | <DL                          | --                                | <DL                                     | <DL                                     | <DL                                      | 0.5                      | 0.5                                 | 4                 | 1                                   | 31                     | 96                        | 90                        | 93                           |
| 1-methyl phenanthrene               | no                          | <DL                      | <DL                          | --                                | <DL                                     | <DL                                     | <DL                                      | 0.3                      | 0.3                                 | 4                 | 3                                   | 15                     | 91                        | 98                        | 95                           |
| 2-methyl phenanthrene               | no                          | <DL                      | <DL                          | --                                | <DL                                     | <DL                                     | <DL                                      | 0.3                      | 0.3                                 | 4                 | 4                                   | 10                     | 91                        | 100                       | 96                           |
| 3-methyl phenanthrene               | no                          | <DL                      | <DL                          | --                                | <DL                                     | <DL                                     | <DL                                      | 0.3                      | 0.3                                 | 4                 | 4                                   | 16                     | 102                       | 90                        | 96                           |
| 9-methyl phenanthrene               | no                          | <DL                      | <DL                          | --                                | <DL                                     | <DL                                     | <DL                                      | 0.3                      | 0.3                                 | 4                 | 3                                   | 15                     | 99                        | 94                        | 97                           |
| <i>Pesticides</i>                   |                             |                          |                              |                                   |                                         |                                         |                                          |                          |                                     |                   |                                     |                        |                           |                           |                              |
| alachlor                            | no                          | <DL                      | <DL                          | --                                | <DL                                     | <DL                                     | <DL                                      | 0.7                      | 0.7                                 | 4                 | 0                                   | --                     | 88                        | 76                        | 82                           |
| aldrin                              | no                          | <DL                      | <DL                          | --                                | <DL                                     | <DL                                     | <DL                                      | 0.7                      | 0.7                                 | 4                 | 0                                   | --                     | 107                       | 86                        | 97                           |
| atrazine                            | no                          | <DL                      | <DL                          | --                                | <DL                                     | <DL                                     | <DL                                      | 0.3                      | 0.3                                 | 4                 | 0                                   | --                     | 94                        | 125                       | 110                          |
| bendiocarb                          | no                          | <DL                      | <DL                          | --                                | <DL                                     | <DL                                     | <DL                                      | 2                        | 2                                   | 4                 | 0                                   | --                     | 65                        | 86                        | 76                           |
| carbaryl                            | no                          | <DL                      | <DL                          | --                                | <DL                                     | <DL                                     | <DL                                      | 0.7                      | 0.7                                 | 4                 | 0                                   | --                     | 85                        | 94                        | 90                           |
| carbofuran                          | no                          | <DL                      | <DL                          | --                                | <DL                                     | <DL                                     | <DL                                      | 0.7                      | 0.7                                 | 4                 | 0                                   | --                     | 72                        | 104                       | 88                           |
| alpha-chlordane                     | no                          | <DL                      | <DL                          | --                                | <DL                                     | <DL                                     | <DL                                      | 0.3                      | 0.3                                 | 4                 | 1                                   | 4                      | 97                        | 83                        | 90                           |
| gamma-chlordane                     | no                          | <DL                      | <DL                          | --                                | <DL                                     | <DL                                     | <DL                                      | 0.3                      | 0.3                                 | 4                 | 1                                   | 10                     | 97                        | 83                        | 90                           |
| chlorothalonil                      | no                          | <DL                      | <DL                          | --                                | <DL                                     | <DL                                     | <DL                                      | 0.4                      | 0.4                                 | 4                 | 1                                   | 13                     | 122                       | 137                       | 130                          |
| chlorpyrifos                        | no                          | <DL                      | <DL                          | --                                | <DL                                     | <DL                                     | <DL                                      | 0.3                      | 0.3                                 | 4                 | 2                                   | 10                     | 96                        | 95                        | 96                           |
| cyanazine                           | no                          | <DL                      | <DL                          | --                                | <DL                                     | <DL                                     | <DL                                      | 1                        | 1                                   | 4                 | 0                                   | --                     | 104                       | 87                        | 96                           |
| cypermethrin                        | no                          | <DL                      | <DL                          | --                                | <DL                                     | <DL                                     | <DL                                      | 2                        | 2                                   | 4                 | 0                                   | --                     | 74                        | 104                       | 89                           |
| 4,4'-DDD                            | no                          | <DL                      | <DL                          | --                                | <DL                                     | <DL                                     | <DL                                      | 0.3                      | 0.3                                 | 4                 | 0                                   | --                     | 82                        | 75                        | 79                           |

| Compound                         | Blanks                      |                          |                              |                                   |                                         |                                         |                                          |                          |                                     | Duplicates        |                                     |                        | Matrix Spike Recoveries   |                           |                              |
|----------------------------------|-----------------------------|--------------------------|------------------------------|-----------------------------------|-----------------------------------------|-----------------------------------------|------------------------------------------|--------------------------|-------------------------------------|-------------------|-------------------------------------|------------------------|---------------------------|---------------------------|------------------------------|
|                                  | Blank Correct. <sup>a</sup> | Blank Correct. Mass (ng) | Blank Correct. Conc. (ng/m3) | Change in Median (%) <sup>b</sup> | Field Blank Max. Mass (ng) <sup>c</sup> | Batch Blank Max. Mass (ng) <sup>d</sup> | Matrix Blank Max. Mass (ng) <sup>e</sup> | MRL (ng/m3) <sup>f</sup> | Max.-based MRL (ng/m3) <sup>g</sup> | No. of Dup. Pairs | No. of Det. Dup. Pairs <sup>h</sup> | Mean Percent Diff. (%) | Matrix Spike Recov. 1 (%) | Matrix Spike Recov. 2 (%) | Ave. Matrix Spike Recov. (%) |
| 4,4'-DDE <sup>i</sup>            | no                          | <DL                      | <DL                          | --                                | <DL                                     | 7.8                                     | <DL                                      | 0.3                      | 0.6                                 | 4                 | 0                                   | --                     | 99                        | 86                        | 93                           |
| 4,4'-DDT <sup>i</sup>            | no                          | <DL                      | <DL                          | --                                | <DL                                     | 11                                      | <DL                                      | 0.3                      | 0.9                                 | 4                 | 1                                   | 32                     | 69                        | 69                        | 69                           |
| diazinon                         | no                          | <DL                      | <DL                          | --                                | <DL                                     | <DL                                     | <DL                                      | 0.3                      | 0.3                                 | 4                 | 0                                   | --                     | 92                        | 85                        | 89                           |
| dichlorvos                       | no                          | <DL                      | <DL                          | --                                | <DL                                     | <DL                                     | <DL                                      | 0.7                      | 0.7                                 | 4                 | 0                                   | --                     | 91                        | 109                       | 100                          |
| dicofol                          | no                          | <DL                      | <DL                          | --                                | <DL                                     | <DL                                     | <DL                                      | 0.7                      | 0.7                                 | 4                 | 0                                   | --                     | 70                        | 88                        | 79                           |
| dieldrin                         | no                          | <DL                      | <DL                          | --                                | <DL                                     | <DL                                     | <DL                                      | 0.7                      | 0.7                                 | 4                 | 0                                   | --                     | 100                       | 82                        | 91                           |
| endrin                           | no                          | <DL                      | <DL                          | --                                | <DL                                     | <DL                                     | <DL                                      | 0.7                      | 0.7                                 | 4                 | 0                                   | --                     | 76                        | 78                        | 77                           |
| ethyl parathion                  | no                          | <DL                      | <DL                          | --                                | <DL                                     | <DL                                     | <DL                                      | 2                        | 2                                   | 4                 | 0                                   | --                     | 58                        | 81                        | 70                           |
| heptachlor                       | no                          | <DL                      | <DL                          | --                                | <DL                                     | <DL                                     | <DL                                      | 0.3                      | 0.3                                 | 4                 | 0                                   | --                     | 95                        | 86                        | 91                           |
| HPTE                             | no                          | <DL                      | <DL                          | --                                | <DL                                     | <DL                                     | <DL                                      | 0.8                      | 0.8                                 | 1                 | 0                                   | --                     | 75                        | 62                        | 69                           |
| lindane                          | no                          | <DL                      | <DL                          | --                                | <DL                                     | <DL                                     | <DL                                      | 0.7                      | 0.7                                 | 4                 | 0                                   | --                     | 101                       | 84                        | 93                           |
| malathion                        | no                          | <DL                      | <DL                          | --                                | <DL                                     | <DL                                     | <DL                                      | 0.3                      | 0.3                                 | 4                 | 1                                   | 18                     | 73                        | 107                       | 90                           |
| methoxychlor                     | no                          | <DL                      | <DL                          | --                                | <DL                                     | <DL                                     | <DL                                      | 0.7                      | 0.7                                 | 4                 | 0                                   | --                     | 68                        | 76                        | 72                           |
| methyl parathion                 | no                          | <DL                      | <DL                          | --                                | <DL                                     | <DL                                     | <DL                                      | 0.7                      | 0.7                                 | 4                 | 0                                   | --                     | 57                        | 86                        | 72                           |
| metolachlor                      | no                          | <DL                      | <DL                          | --                                | <DL                                     | <DL                                     | <DL                                      | 0.3                      | 0.3                                 | 4                 | 0                                   | --                     | 84                        | 76                        | 80                           |
| nitrofen                         | no                          | <DL                      | <DL                          | --                                | <DL                                     | <DL                                     | <DL                                      | 0.7                      | 0.7                                 | 4                 | 0                                   | --                     | 55                        | 70                        | 63                           |
| pentachlorophenol <sup>i</sup>   | no                          | <DL                      | <DL                          | --                                | 70                                      | <DL                                     | <DL                                      | 0.8                      | 6                                   | 1                 | 1                                   | 4                      | 76                        | 88                        | 82                           |
| cis-permethrin                   | no                          | <DL                      | <DL                          | --                                | <DL                                     | <DL                                     | <DL                                      | 0.3                      | 0.3                                 | 4                 | 0                                   | --                     | 99                        | 96                        | 98                           |
| trans-permethrin                 | no                          | <DL                      | <DL                          | --                                | <DL                                     | <DL                                     | <DL                                      | 0.6                      | 0.6                                 | 4                 | 0                                   | --                     | 77                        | 100                       | 89                           |
| piperonyl butoxide               | no                          | <DL                      | <DL                          | --                                | <DL                                     | <DL                                     | <DL                                      | 0.3                      | 0.3                                 | 4                 | 1                                   | 5                      | 52                        | 75                        | 64                           |
| o-phenyl phenol                  | no                          | <DL                      | <DL                          | --                                | 3.6                                     | <DL                                     | <DL                                      | 0.3                      | 0.3                                 | 4                 | 4                                   | 23                     | 76                        | 80                        | 78                           |
| prometon                         | no                          | <DL                      | <DL                          | --                                | <DL                                     | <DL                                     | <DL                                      | 0.7                      | 0.7                                 | 4                 | 0                                   | --                     | 61                        | 64                        | 63                           |
| propoxur                         | no                          | <DL                      | <DL                          | --                                | <DL                                     | <DL                                     | <DL                                      | 1                        | 1                                   | 4                 | 0                                   | --                     | 61                        | 71                        | 66                           |
| simazine                         | no                          | <DL                      | <DL                          | --                                | <DL                                     | <DL                                     | <DL                                      | 0.7                      | 0.7                                 | 4                 | 0                                   | --                     | 88                        | 117                       | 103                          |
| trifluralin                      | no                          | <DL                      | <DL                          | --                                | <DL                                     | <DL                                     | <DL                                      | 0.4                      | 0.4                                 | 4                 | 0                                   | --                     | 52                        | 53                        | 53                           |
| <i>Phenols and Miscellaneous</i> |                             |                          |                              |                                   |                                         |                                         |                                          |                          |                                     |                   |                                     |                        |                           |                           |                              |
| 3-biphenylol                     | no                          | <DL                      | <DL                          | --                                | <DL                                     | <DL                                     | <DL                                      | 0.8                      | 0.8                                 | 1                 | 0                                   | --                     | 52                        | 69                        | 61                           |
| bisphenol A                      | no                          | <DL                      | <DL                          | --                                | <DL                                     | <DL                                     | <DL                                      | 0.8                      | 0.8                                 | 1                 | 0                                   | --                     | 81                        | 78                        | 80                           |
| bisphenol B                      | no                          | <DL                      | <DL                          | --                                | <DL                                     | <DL                                     | <DL                                      | 0.8                      | 0.8                                 | 1                 | 0                                   | --                     | 60                        | 56                        | 58                           |
| 2-sec-butylphenol                | no                          | <DL                      | <DL                          | --                                | <DL                                     | <DL                                     | <DL                                      | 0.8                      | 0.8                                 | 1                 | 0                                   | --                     | 67                        | 62                        | 65                           |
| 4-sec-butylphenol                | no                          | <DL                      | <DL                          | --                                | <DL                                     | <DL                                     | <DL                                      | 2                        | 2                                   | 1                 | 0                                   | --                     | 81                        | 64                        | 72                           |
| 4-tert-butylphenol               | no                          | <DL                      | <DL                          | --                                | <DL                                     | <DL                                     | <DL                                      | 0.8                      | 0.8                                 | 1                 | 1                                   | 5                      | 70                        | 57                        | 64                           |
| 4-cumylphenol                    | no                          | <DL                      | <DL                          | --                                | <DL                                     | <DL                                     | <DL                                      | 0.8                      | 0.8                                 | 1                 | 0                                   | --                     | 51                        | 61                        | 56                           |
| 2,3-dibromo-1-propanol           | no                          | <DL                      | <DL                          | --                                | <DL                                     | <DL                                     | <DL                                      | 0.8                      | 0.8                                 | 1                 | 0                                   | --                     | --                        | --                        | --                           |

| Compound                               | Blanks                      |                          |                              |                                   |                                         |                                         |                                          |                          |                                     | Duplicates        |                                     |                        | Matrix Spike Recoveries   |                           |                              |
|----------------------------------------|-----------------------------|--------------------------|------------------------------|-----------------------------------|-----------------------------------------|-----------------------------------------|------------------------------------------|--------------------------|-------------------------------------|-------------------|-------------------------------------|------------------------|---------------------------|---------------------------|------------------------------|
|                                        | Blank Correct. <sup>a</sup> | Blank Correct. Mass (ng) | Blank Correct. Conc. (ng/m3) | Change in Median (%) <sup>b</sup> | Field Blank Max. Mass (ng) <sup>c</sup> | Batch Blank Max. Mass (ng) <sup>d</sup> | Matrix Blank Max. Mass (ng) <sup>e</sup> | MRL (ng/m3) <sup>f</sup> | Max.-based MRL (ng/m3) <sup>g</sup> | No. of Dup. Pairs | No. of Det. Dup. Pairs <sup>h</sup> | Mean Percent Diff. (%) | Matrix Spike Recov. 1 (%) | Matrix Spike Recov. 2 (%) | Ave. Matrix Spike Recov. (%) |
| 2,4-dichlorophenol                     | no                          | <DL                      | <DL                          | --                                | <DL                                     | <DL                                     | <DL                                      | 0.8                      | 0.8                                 | 1                 | 0                                   | --                     | 75                        | 60                        | 68                           |
| 3,4-dichlorophenol                     | no                          | <DL                      | <DL                          | --                                | <DL                                     | <DL                                     | <DL                                      | 4                        | 4                                   | 1                 | 0                                   | --                     | 88                        | 90                        | 89                           |
| 2,4-dihydroxybenzophenone <sup>i</sup> | no                          | <DL                      | <DL                          | --                                | <DL                                     | 13                                      | <DL                                      | 0.8                      | 1                                   | 1                 | 0                                   | --                     | 92                        | 66                        | 79                           |
| 2-ethylhexyl 4-hydroxybenzoate         | no                          | <DL                      | <DL                          | --                                | <DL                                     | <DL                                     | <DL                                      | 0.8                      | 0.8                                 | 1                 | 0                                   | --                     | 70                        | 72                        | 71                           |
| 3-hydroxybenzophenone                  | no                          | <DL                      | <DL                          | --                                | <DL                                     | <DL                                     | <DL                                      | 1                        | 1                                   | 1                 | 0                                   | --                     | 85                        | 107                       | 96                           |
| 4-hydroxybenzophenone                  | no                          | <DL                      | <DL                          | --                                | <DL                                     | <DL                                     | <DL                                      | 2                        | 2                                   | 1                 | 0                                   | --                     | --                        | --                        | --                           |
| 4,4'-methylenediphenol                 | no                          | <DL                      | <DL                          | --                                | <DL                                     | <DL                                     | <DL                                      | 0.8                      | 0.8                                 | 1                 | 0                                   | --                     | 43                        | 124                       | 83                           |
| 4-nitrophenol <sup>i</sup>             | no                          | <DL                      | <DL                          | --                                | 44                                      | <DL                                     | <DL                                      | 0.8                      | 4                                   | 1                 | 1                                   | 30                     | 102                       | 87                        | 95                           |
| 4-nitrotoluene                         | no                          | <DL                      | <DL                          | --                                | <DL                                     | <DL                                     | <DL                                      | 0.7                      | 0.7                                 | 4                 | 0                                   | --                     | 74                        | 77                        | 76                           |
| p-pentylphenol                         | no                          | <DL                      | <DL                          | --                                | <DL                                     | <DL                                     | <DL                                      | 0.8                      | 0.8                                 | 1                 | 0                                   | --                     | 78                        | 69                        | 74                           |
| p-phenylphenol                         | no                          | <DL                      | <DL                          | --                                | <DL                                     | <DL                                     | <DL                                      | 1                        | 1                                   | 1                 | 0                                   | --                     | 48                        | 73                        | 60                           |

-- indicates not applicable or not available.

<DL indicates values below analytical detection limit of the laboratory.

<sup>a</sup> Concentrations subject to blank correction if the median mass of all of the blanks is significantly different from zero.

<sup>b</sup> Percent change in the median reported value (if reported) due to blank correction.

<sup>c</sup> Maximum mass detected in field blanks (n=4 neutrals, 3 phenols).

<sup>d</sup> Maximum mass detected in sampler cartridge batch blanks (n=4).

<sup>e</sup> Maximum mass detected in matrix blanks (n=6 neutrals, 5 phenols).

<sup>f</sup> MRL = method reporting limit (defined as the maximum of the analytical detection limit and the 90th percentile of the blanks).

<sup>g</sup> A conservative estimate of the MRL based on maximum detected mass in all blanks (field, batch and matrix). Assumes a median sample volume across all compounds of 12 m<sup>3</sup>.

<sup>h</sup> Number of unqualified (non-flagged) duplicate pairs with reported values.

<sup>i</sup> Indicates less certainty about reported values due to at least one blank exceeding the median of field samples.

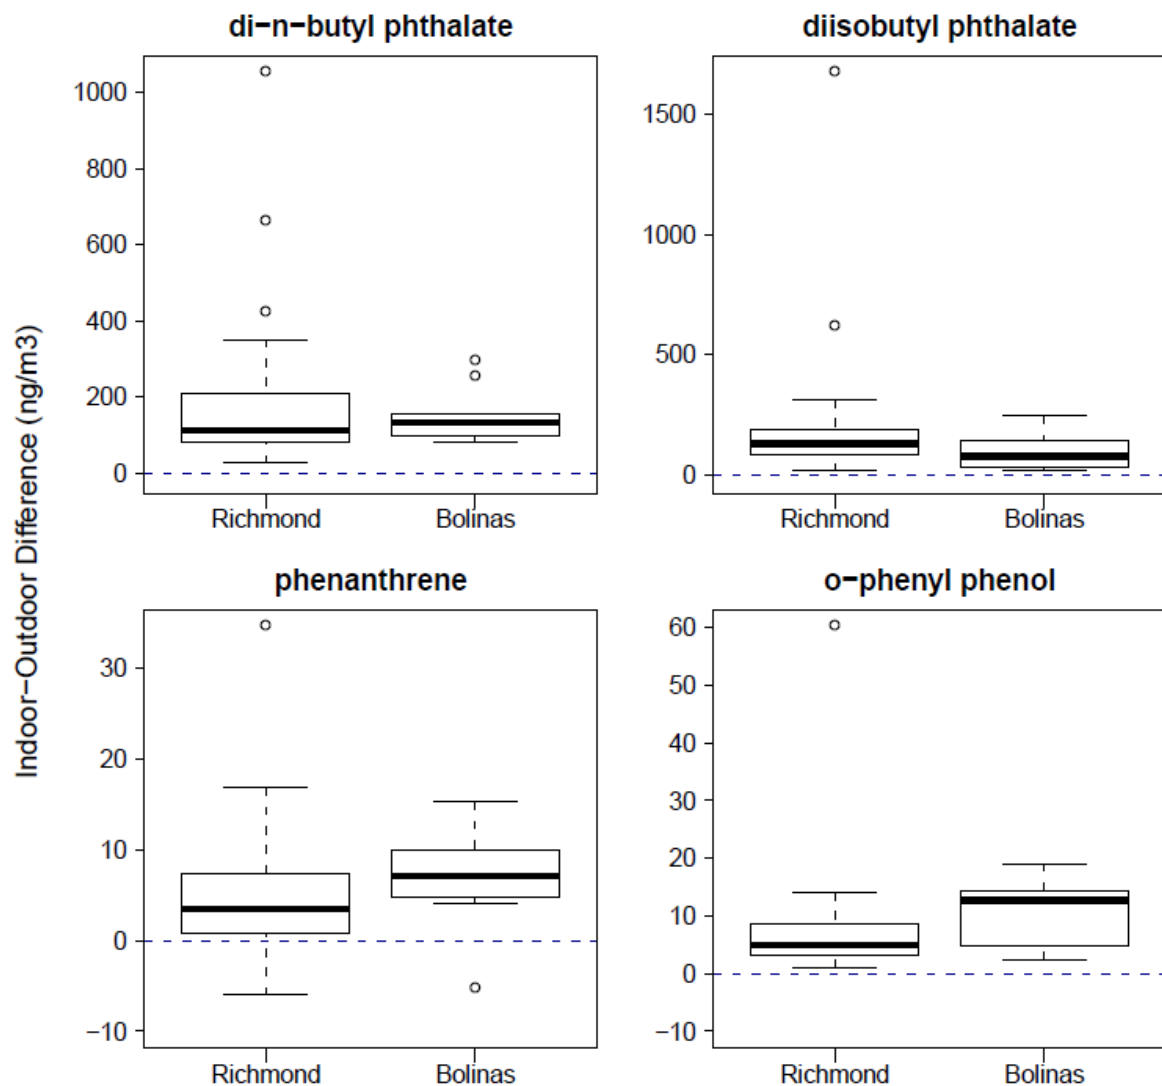

Figure S1 Distribution of indoor-outdoor concentration differences for selected chemicals (concentrations in  $\text{ng}/\text{m}^3$ ). Paired indoor-outdoor concentration differences illustrate the predominance of indoor sources for DBP, DIBP, and oPP, and the greater influence of outdoor sources on indoor levels for phenanthrene in Richmond vs. Bolinas, since only phenanthrene has negative differences. The smaller differences between indoor and outdoor concentrations for oPPh and phenanthrene in Richmond reflect higher outdoor concentrations there. These four chemicals were selected to illustrate primarily indoor vs. mixed source pollutants. Medians include estimated and not detected values. All medians for the drawn distributions are significantly different from zero. Indoor-outdoor differences were calculated for all sample pairs and compounds; however, selected chemicals are presented. For non-detects, the sample-specific MRL was used in the difference calculations. Wilcoxon rank sum tests were used to identify compounds with indoor-outdoor concentration differences significantly different from zero.

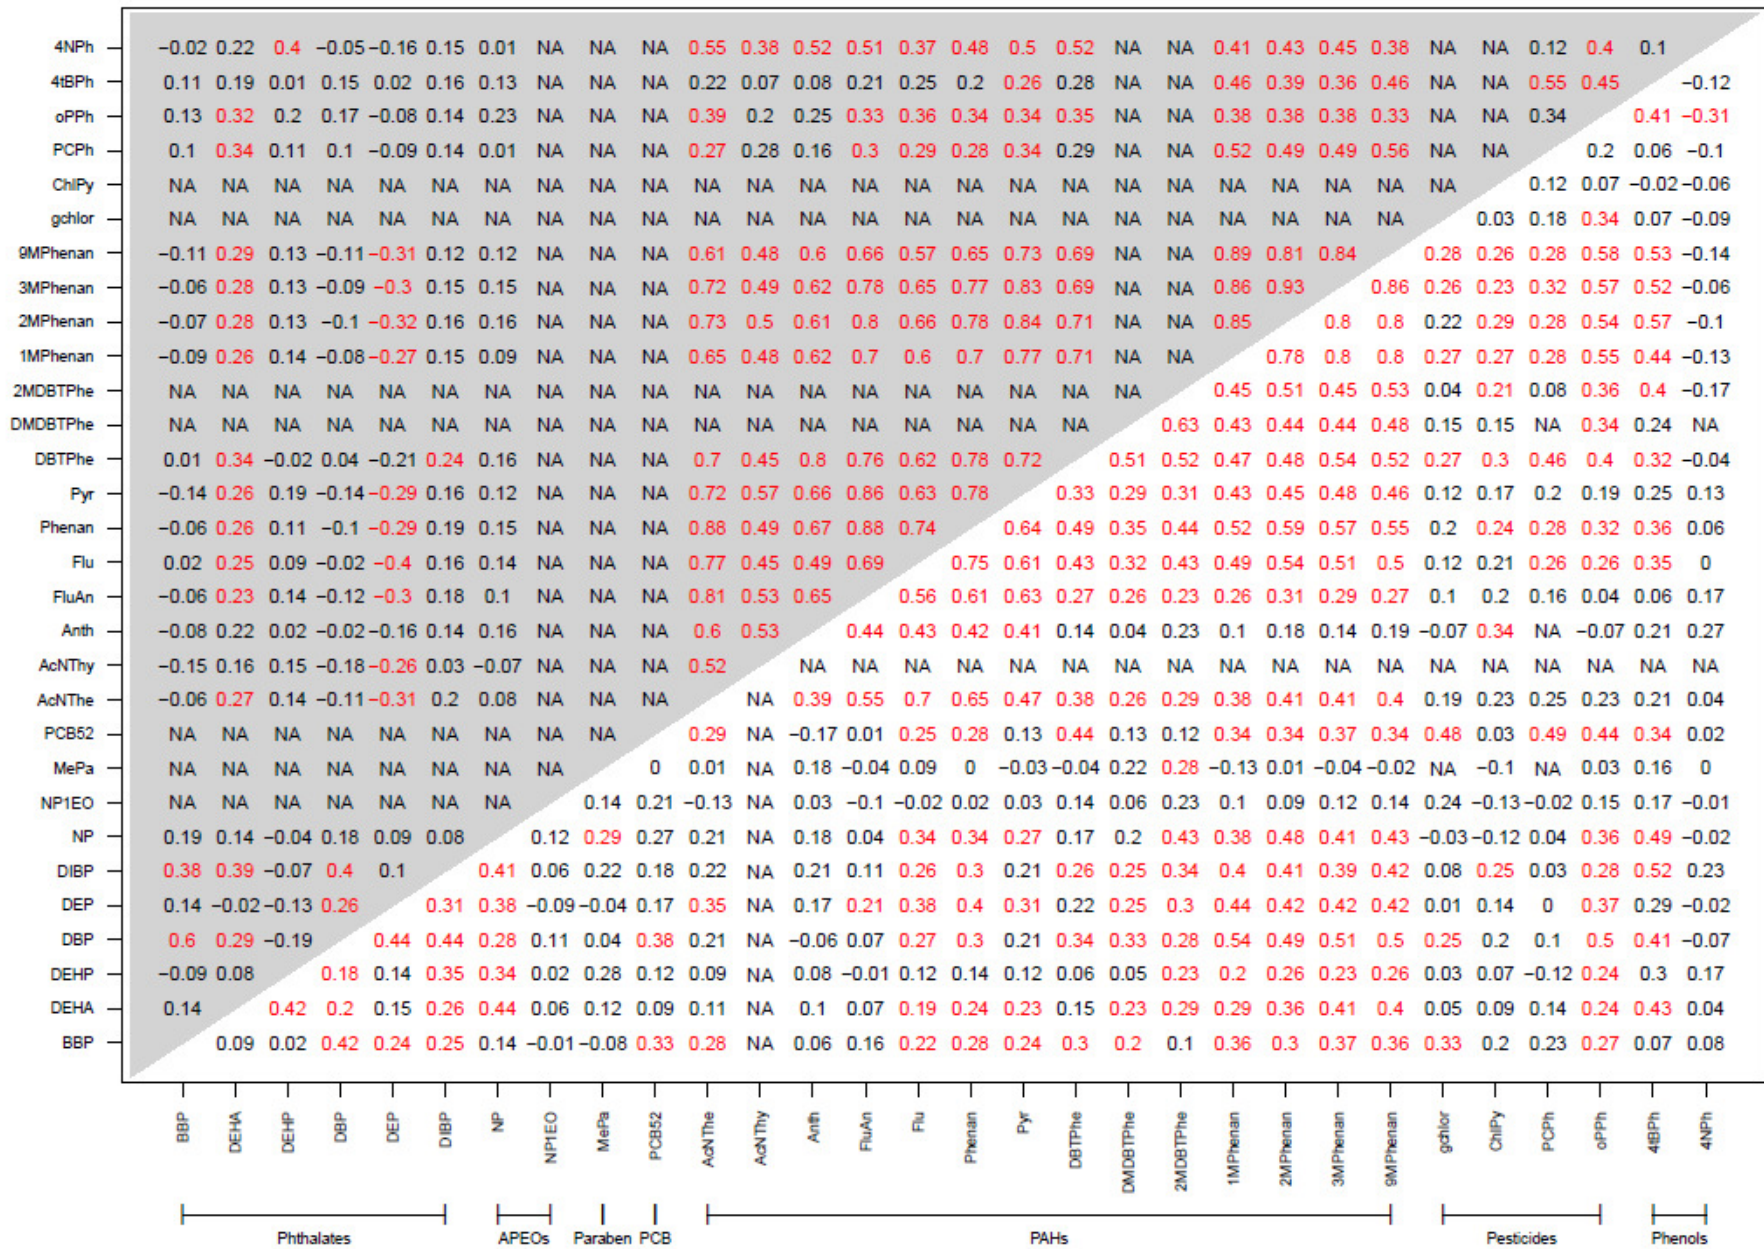

Figure S2 – Kendall’s tau correlations between chemicals. Kendall’s tau correlation estimates are shown for all pairs of chemicals in outdoor air (shaded) and indoor air (not shaded). Statistically significant correlations ( $p < 0.05$ ) are indicated in red. Correlations were estimated for chemicals if  $>30\%$  of the values were estimated or above MRL. Chemicals are ordered by chemical group (phthalates, APEOs (alkylphenols), parabens, PCBs, PAHs, pesticides, phenols; as in the tables). Tables include key to chemical abbreviations.

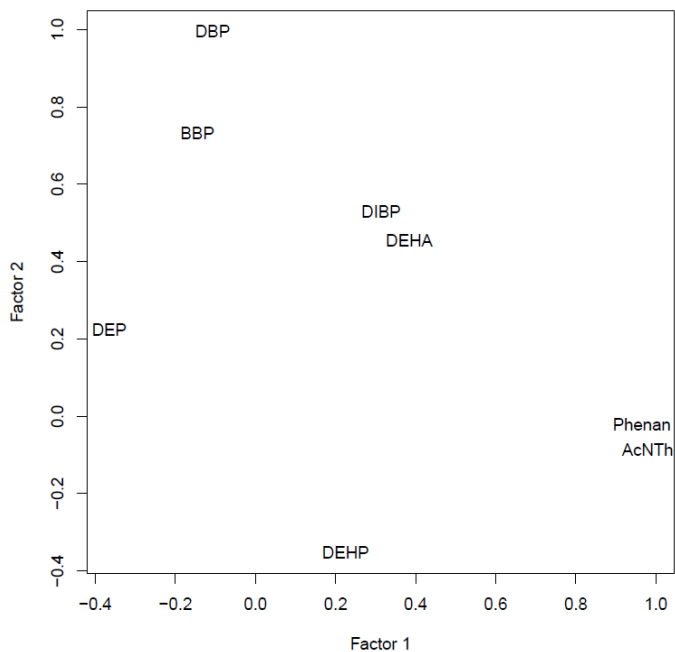

(a)

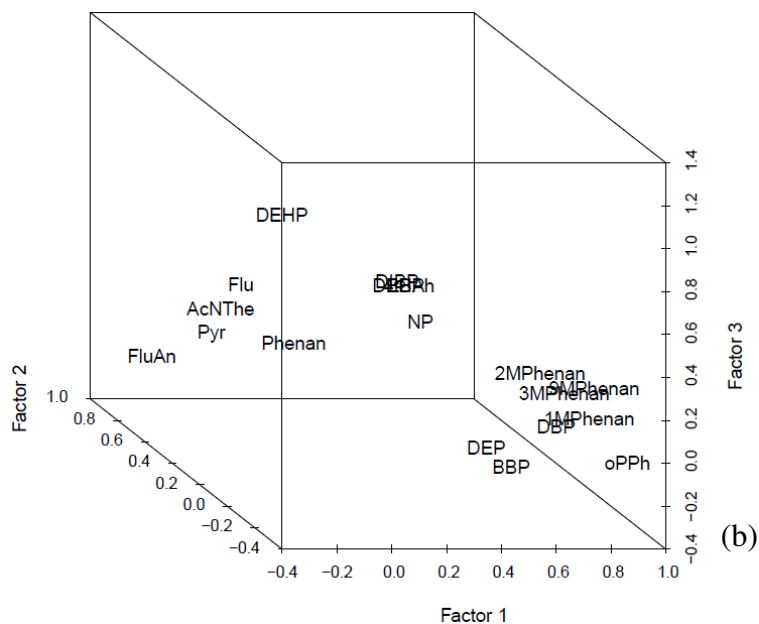

(b)

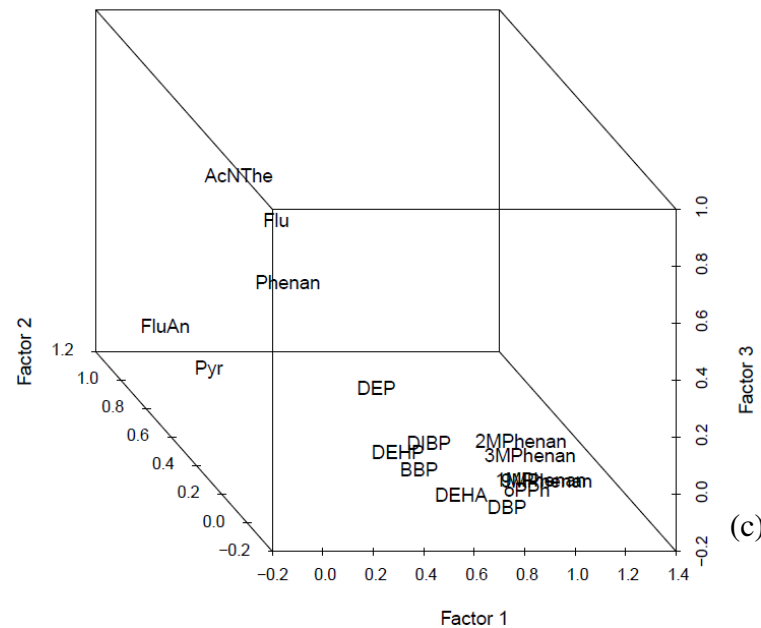

(c)

Figures S3a-c – Factor loadings for chemicals with 100% detects. Figure S3a shows loadings for 2 factors for chemicals in outdoor air. Figure S3b shows loadings for 3 factors for chemicals detected in indoor air in 31 homes with both phenol and neutral chemicals reported (DEHA, DIBP, and 4-t-butylphenol are overlapping at ~0.6 on Factor 3). Figure S3c shows loadings for 3 factors for neutrals analytes in indoor air in 50 homes.



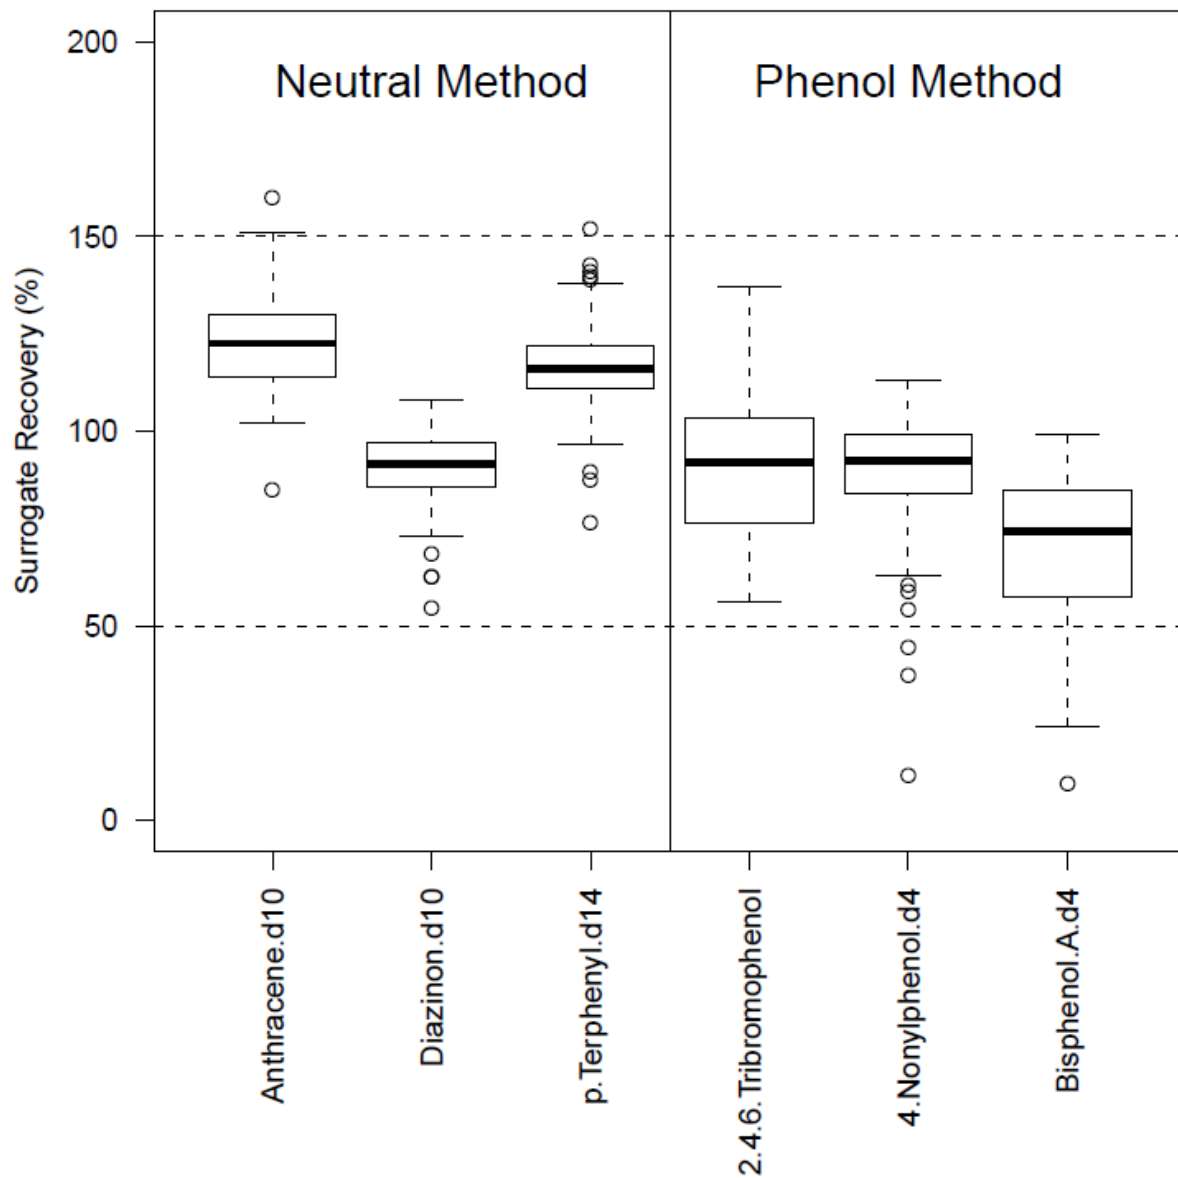

Figure S4 – Surrogate recovery distributions for three surrogates for each analytical method. Recovery of diazinon-d10 was acceptable (within 50-150% acceptance range) in all samples (114/114), recovery of anthracene-d10 was above 150% for 2/114 samples, recovery of p-terphenyl-d14 was above 150% in 1/114 samples, recovery of 2,4,6-tribromophenol was acceptable in all samples (75/75), recovery of 4-nonylphenol-d4 was below 50% in 3/75 samples, and recovery of bisphenol A-d4 was below 50% in 8/75 samples.
